# Supplementary material for: Historical Films in the Latin Classroom.
Source: Royal Society of Chemistry journal article supplement (doi:10.1039/c8ob03112f), 1992-01-01
Supplement: c8ob03112f1.pdf [file c8ob03112f1.pdf]

## Electronic Supporting Information

Homopurine  $R_p$ -stereodefined phosphorothioate analogs of DNA with hampered Watson-Crick base pairings form Hoogsteen paired parallel duplexes with (2'-OMe)-RNA templates.

Anna Maciaszek\*, Katarzyna Jastrzębska, Piotr Guga

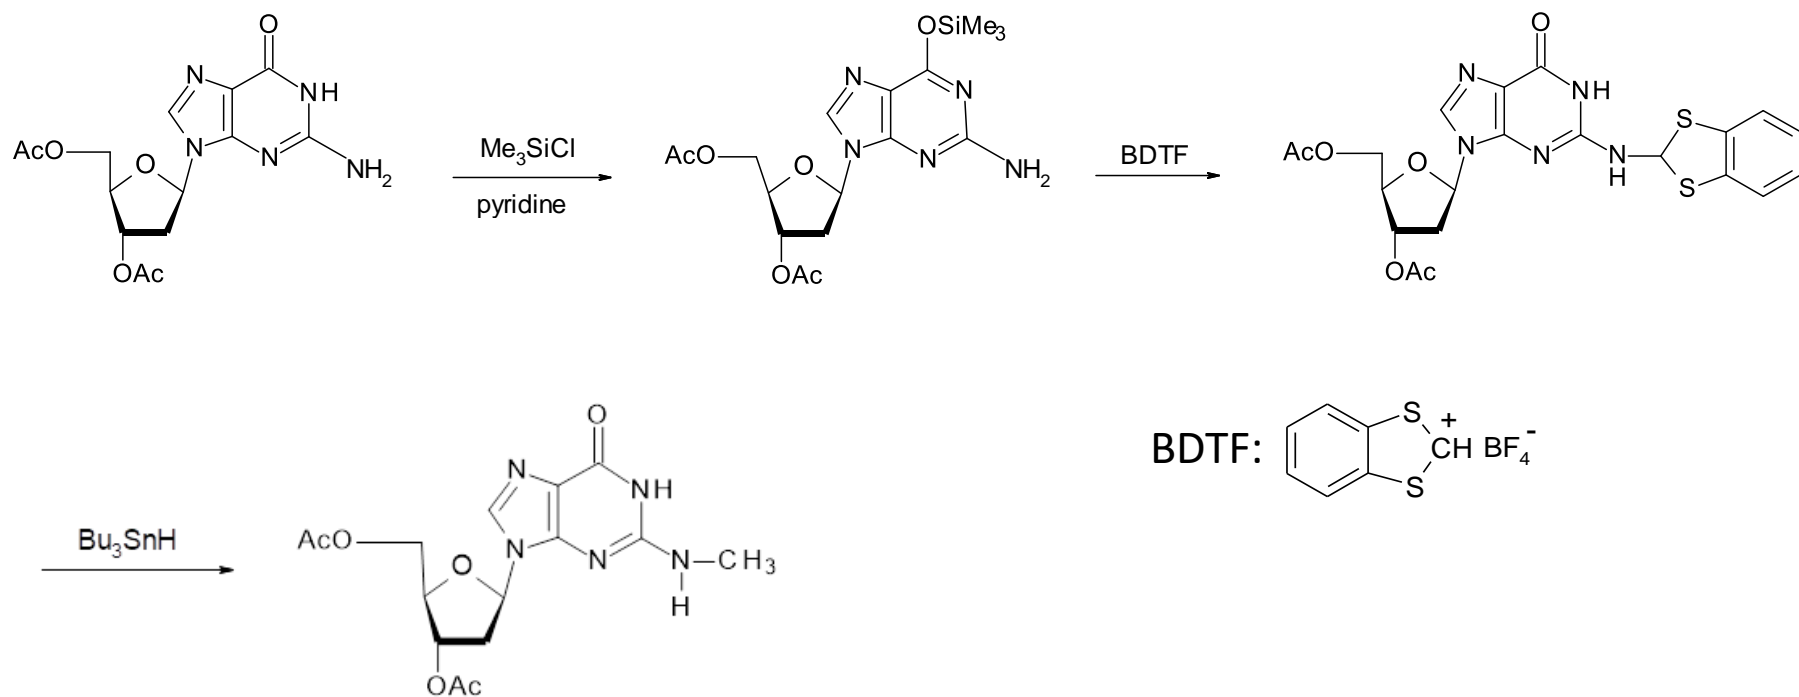

Scheme 1S. Synthesis of an  $N^2$ -methylated derivative of 2'-deoxyguanosine

Figure 1S. Spectra for 5'-O-DMT-*N*<sup>6</sup>-methyl-deoxyadenosine-3'-O-(2-thio-4,4-pentamethylene-1,3,2-oxathiaphospholane) – *fast* (**6f**)

A) HR MS

B) <sup>31</sup>P

C) <sup>1</sup>H NMR

D) <sup>13</sup>C NMR

# Elemental Composition Report

## Single Mass Analysis

Tolerance = 2.5 PPM / DBE: min = -10.0, max = 60.0

Element prediction: Off

Number of isotope peaks used for i-FIT = 5

A) HR MS

Monoisotopic Mass, Odd and Even Electron Ions

187 formula(e) evaluated with 2 results within limits (up to 50 closest results for each mass)

Elements Used:

C: 0-42 H: 0-50 N: 0-6 O: 2-7 P: 1-1 S: 0-3

180726\_ADM\_941 17 (0.197) Cm (14:21)

1: TOF MS ES+

4.13e+007

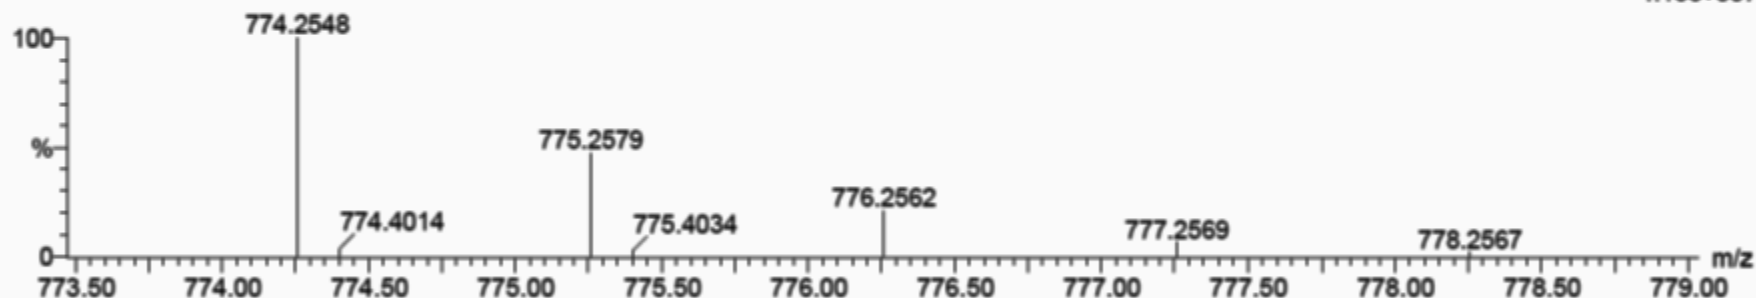

Minimum: -10.0  
Maximum: 15.0 2.5 60.0

| Mass     | Calc. Mass | mDa  | PPM  | DBE  | i-FIT | Norm  | Conf (%) | Formula            |
|----------|------------|------|------|------|-------|-------|----------|--------------------|
| 774.2548 | 774.2549   | -0.1 | -0.1 | 20.5 | 95.1  | 0.000 | 99.99    | C39 H45 N5 O6 P S2 |
|          | 774.2562   | -1.4 | -1.8 | 20.0 | 104.9 | 9.787 | 0.01     | C41 H47 N2 O7 P S2 |

ADM-740fast

105.096

B)  $^{31}\text{P}$  NMR

```
NAME      AMac10921_2017
EXPNO     1
PROCNO    1
Date_     20170921
Time      11.28
INSTRUM   AV-200
PROBHD    5 mm QNP 1H/13
PULPROG   zgpg30
TD        32768
SOLVENT   CDC13
NS        64
DS        2
SWH       36496.352 Hz
FIDRES    1.113780 Hz
AQ        0.4489716 sec
RG        2048
DW        13.700 usec
DE        7.00 usec
TE        8.0 K
D1        2.00000000 sec
d11       0.03000000 sec
DELTA     1.899999998 sec
TDO       1
```

```
===== CHANNEL f1 =====
NUC1      31P
P1        9.60 usec
PL1       2.00 dB
SFO1      81.0283030 MHz
```

```
===== CHANNEL f2 =====
CPDPRG2   waltz16
NUC2      1H
PCPD2     100.00 usec
PL2       -1.00 dB
PL12      22.10 dB
PL13      40.00 dB
SFO2      200.1610008 MHz
SI        16384
SF        81.0262430 MHz
WDW       EM
SSB       0
LB        2.00 Hz
GB        0
PC        1.40
```

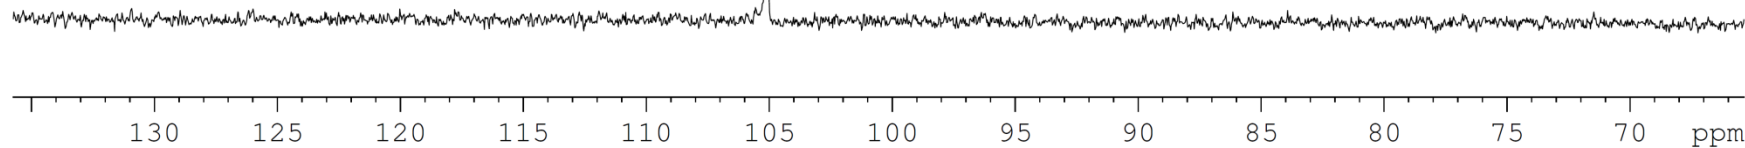

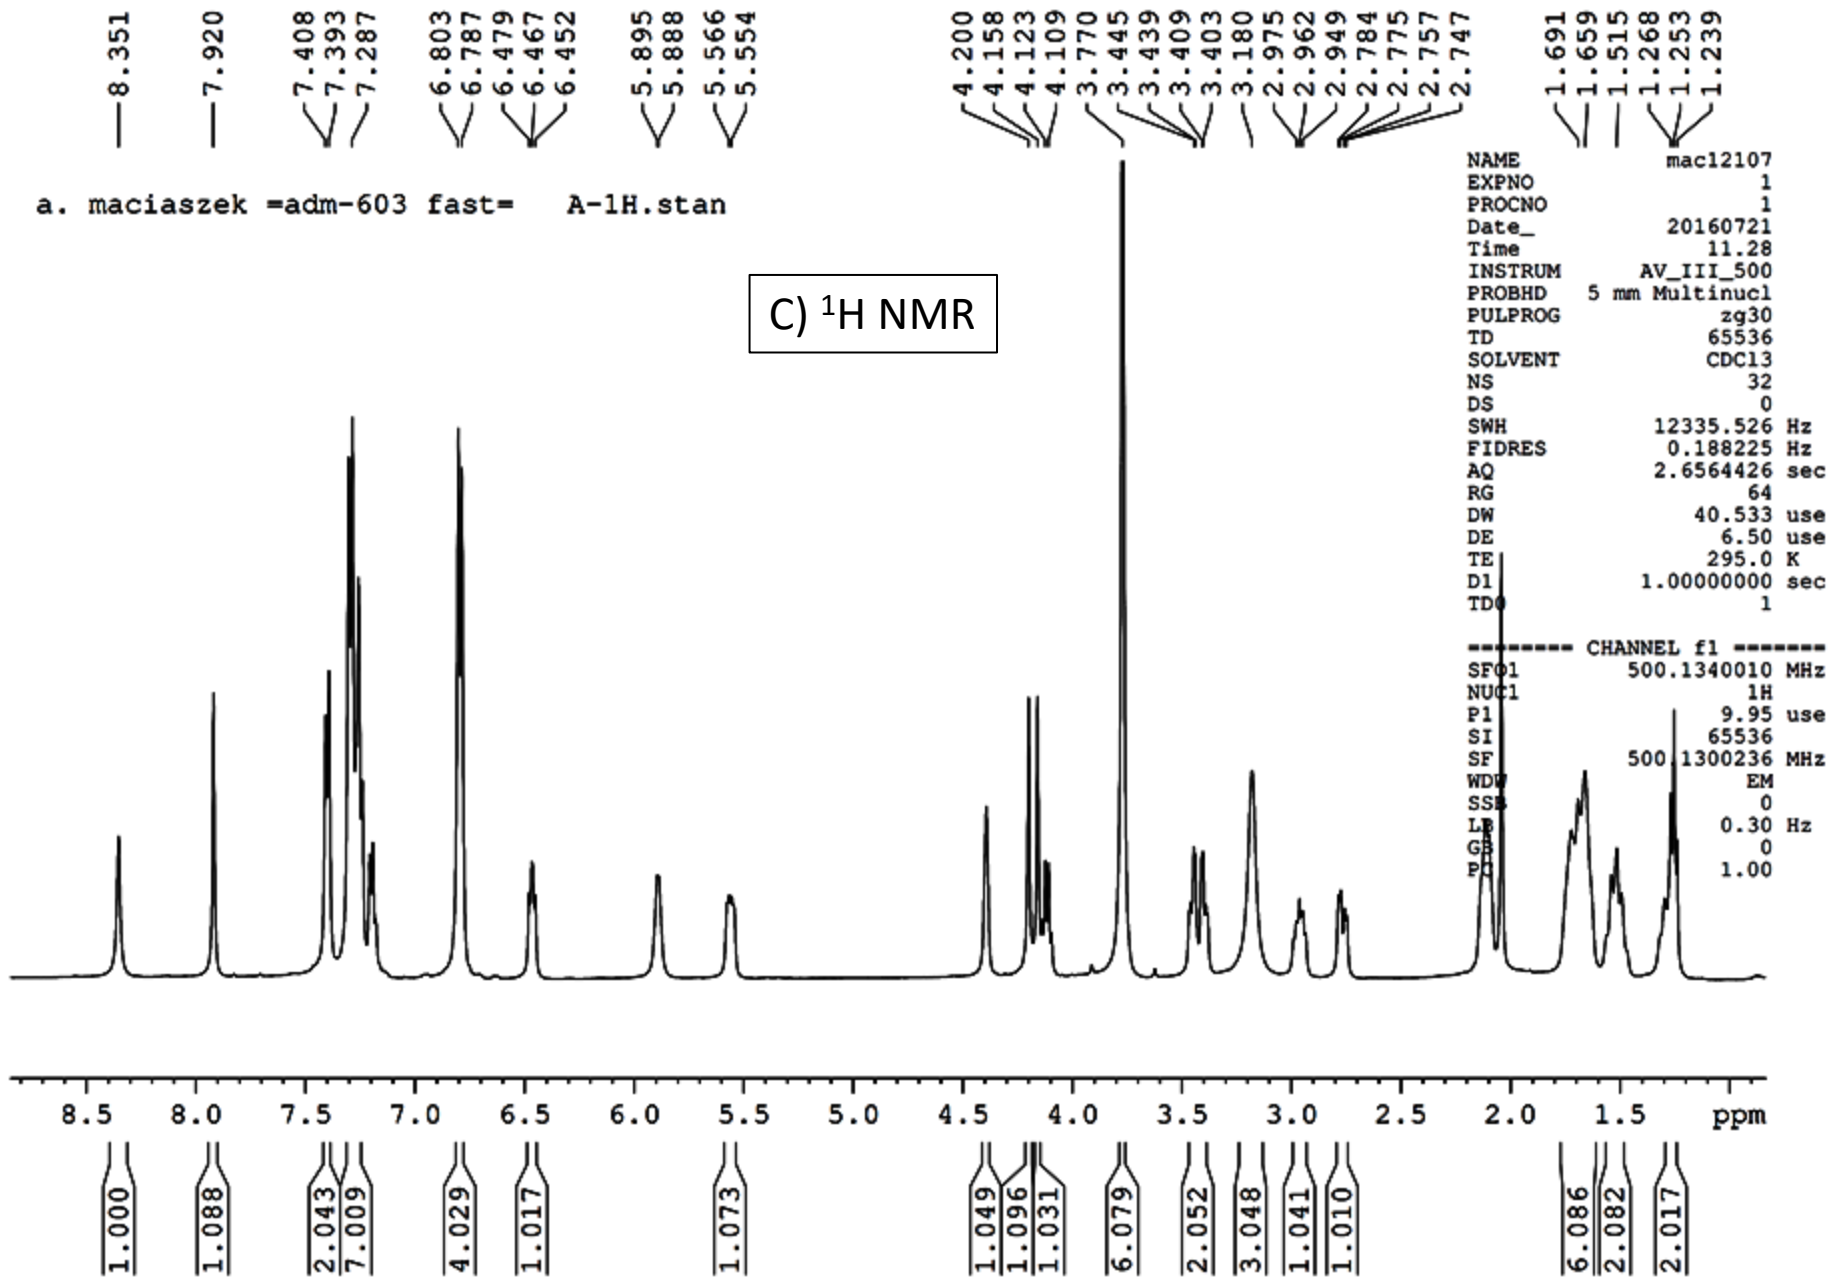

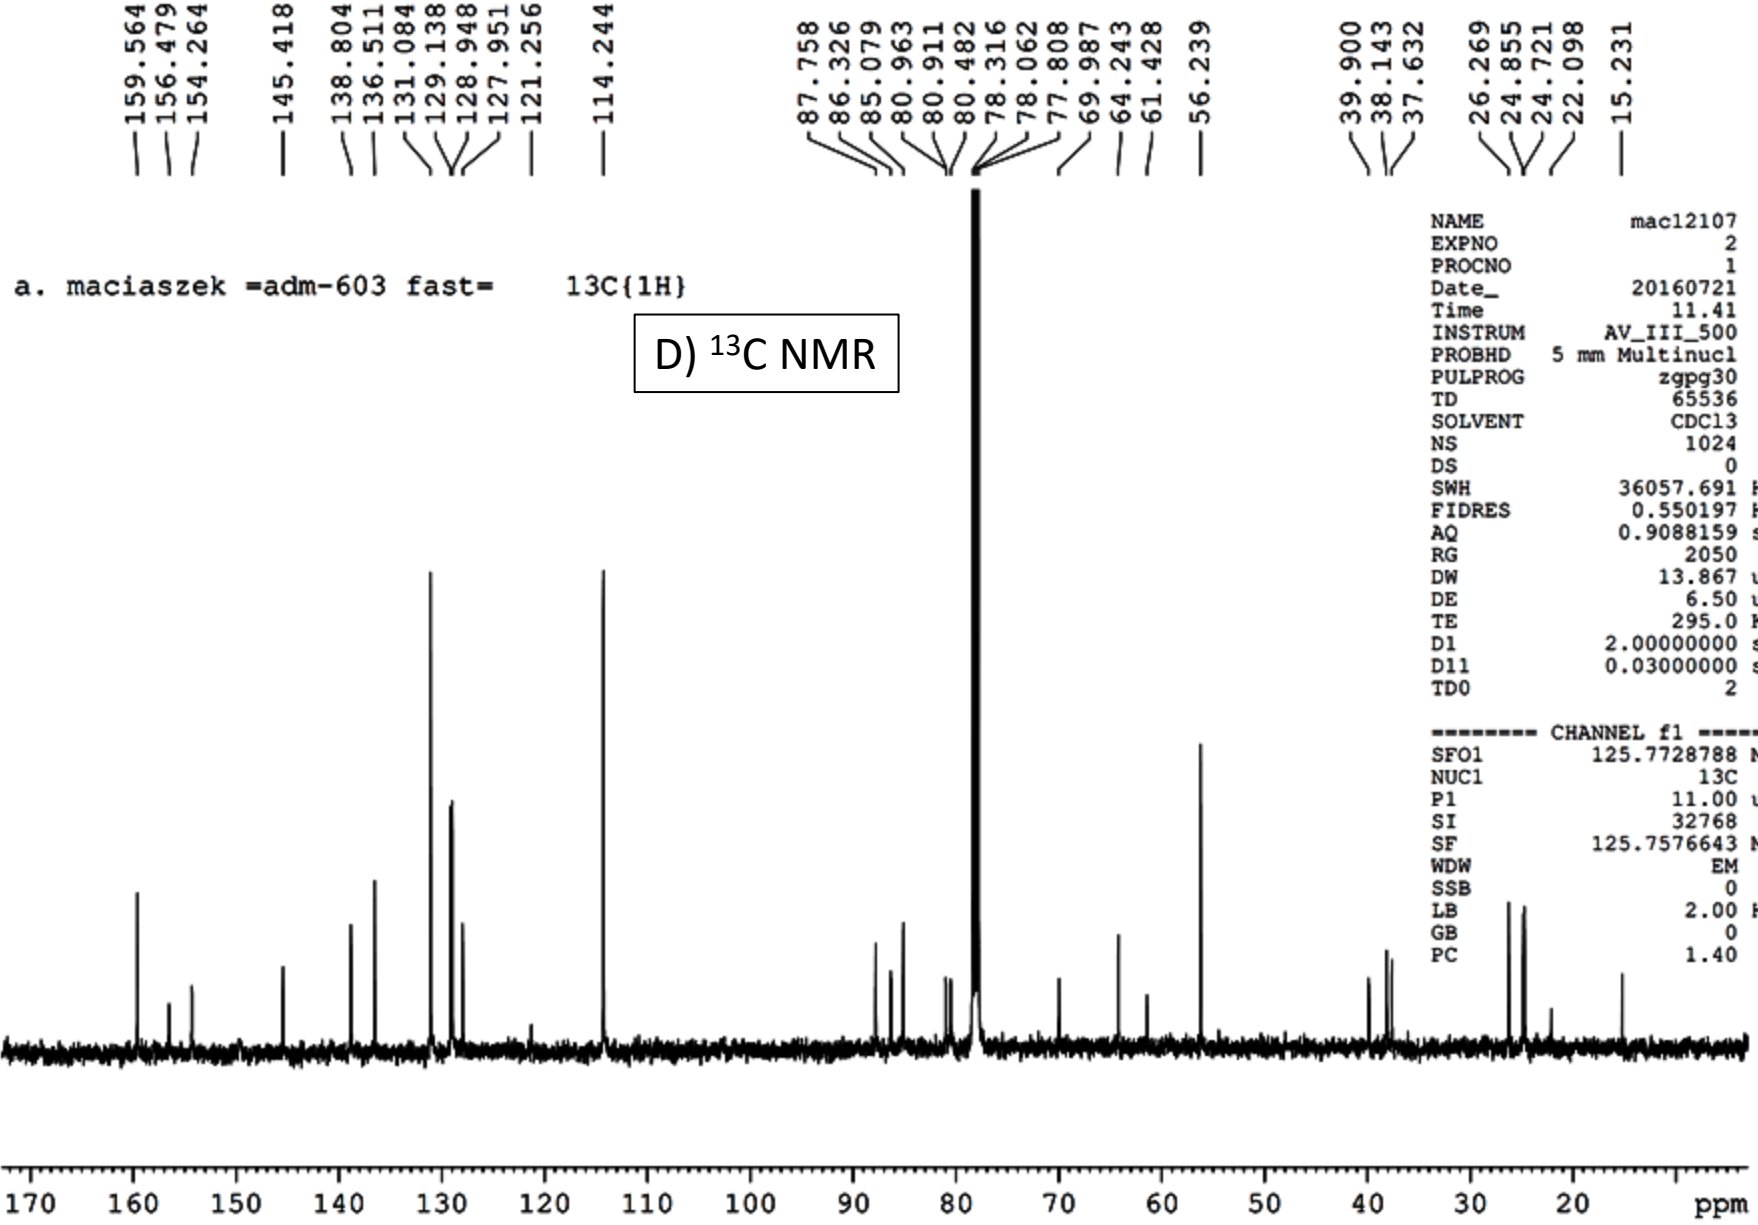

```

NAME          mac12107
EXPNO         2
PROCNO        1
Date_         20160721
Time          11.41
INSTRUM       AV_III_500
PROBHD        5 mm Multinucl
PULPROG       zgpg30
TD            65536
SOLVENT       CDC13
NS            1024
DS            0
SWH           36057.691 Hz
FIDRES        0.550197 Hz
AQ            0.9088159 sec
RG            2050
DW            13.867 usec
DE            6.50 usec
TE            295.0 K
D1            2.00000000 sec
D11           0.03000000 sec
TD0           2
  
```

```

----- CHANNEL f1 -----
SF01          125.7728788 MHz
NUC1          13C
P1            11.00 usec
SI            32768
SF            125.7576643 MHz
WDW           EM
SSB           0
LB            2.00 Hz
GB            0
PC            1.40
  
```

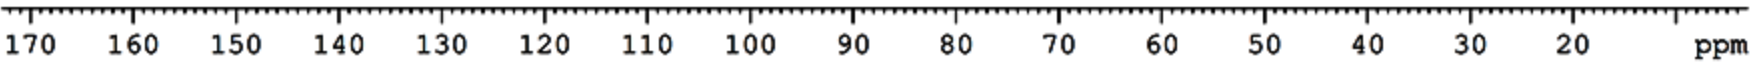

Figure 2S. Spectra for 5'-O-DMT-*N*<sup>6</sup>-methyl-deoxyadenosine-3'-O-(2-thio-4,4-pentamethylene-1,3,2-oxathiaphospholane) – *slow* (**6s**)

- A) HR MS
- B) <sup>31</sup>P
- C) <sup>1</sup>H NMR
- D) <sup>13</sup>C NMR



# Elemental Composition Report

A) HR MS

## Single Mass Analysis

Tolerance = 2.5 PPM / DBE: min = -10.0, max = 60.0

Element prediction: Off

Number of isotope peaks used for i-FIT = 5

### Monoisotopic Mass, Even Electron Ions

187 formula(e) evaluated with 1 results within limits (up to 50 closest results for each mass)

Elements Used:

C: 0-42 H: 0-50 N: 0-6 O: 2-7 P: 1-1 S: 0-3

180726\_ADM\_942 17 (0.197) Cm (14:24-(1:11+39:72))

1: TOF MS ES+

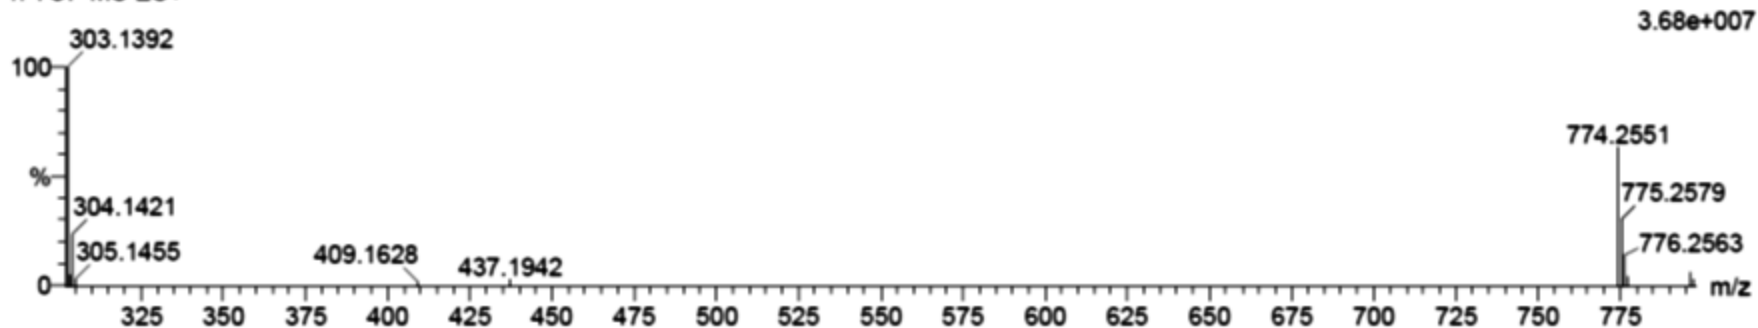

Minimum: -10.0  
Maximum: 15.0 2.5 60.0

| Mass     | Calc. Mass | mDa | PPM | DBE  | i-FIT | Norm | Conf (%) | Formula            |
|----------|------------|-----|-----|------|-------|------|----------|--------------------|
| 774.2551 | 774.2549   | 0.2 | 0.3 | 20.5 | 125.3 | n/a  | n/a      | C39 H45 N5 O6 P S2 |

ADM-741slow

105.233

B) <sup>31</sup>P NMR

```
NAME      AMac10921_2017
EXPNO     2
PROCNO    1
Date_     20170921
Time      11.35
INSTRUM   AV-200
PROBHD    5 mm QNP 1H/13
PULPROG   zgpg30
TD        32768
SOLVENT   CDC13
NS        64
DS        2
SWH       36496.352 Hz
FIDRES    1.113780 Hz
AQ        0.4489716 sec
RG        2298.8
DW        13.700 usec
DE        7.00 usec
TE        8.0 K
D1        2.00000000 sec
d11       0.03000000 sec
DELTA     1.89999998 sec
TD0       1

----- CHANNEL f1 -----
NUC1      31P
P1        9.60 usec
PL1       2.00 dB
SFO1     81.0283030 MHz

----- CHANNEL f2 -----
CPDPRG2   waltz16
NUC2      1H
PCPD2     100.00 usec
PL2       -1.00 dB
PL12      22.10 dB
PL13      40.00 dB
SFO2     200.1610008 MHz
SI        16384
SF        81.0262430 MHz
WDW       EM
SSB       0
LB        2.00 Hz
GB        0
PC        1.40
```

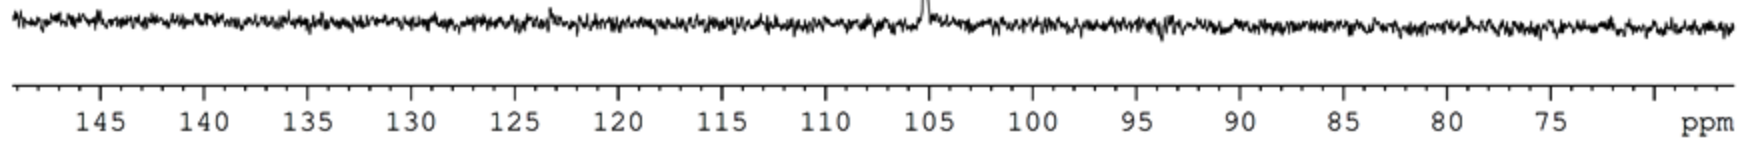

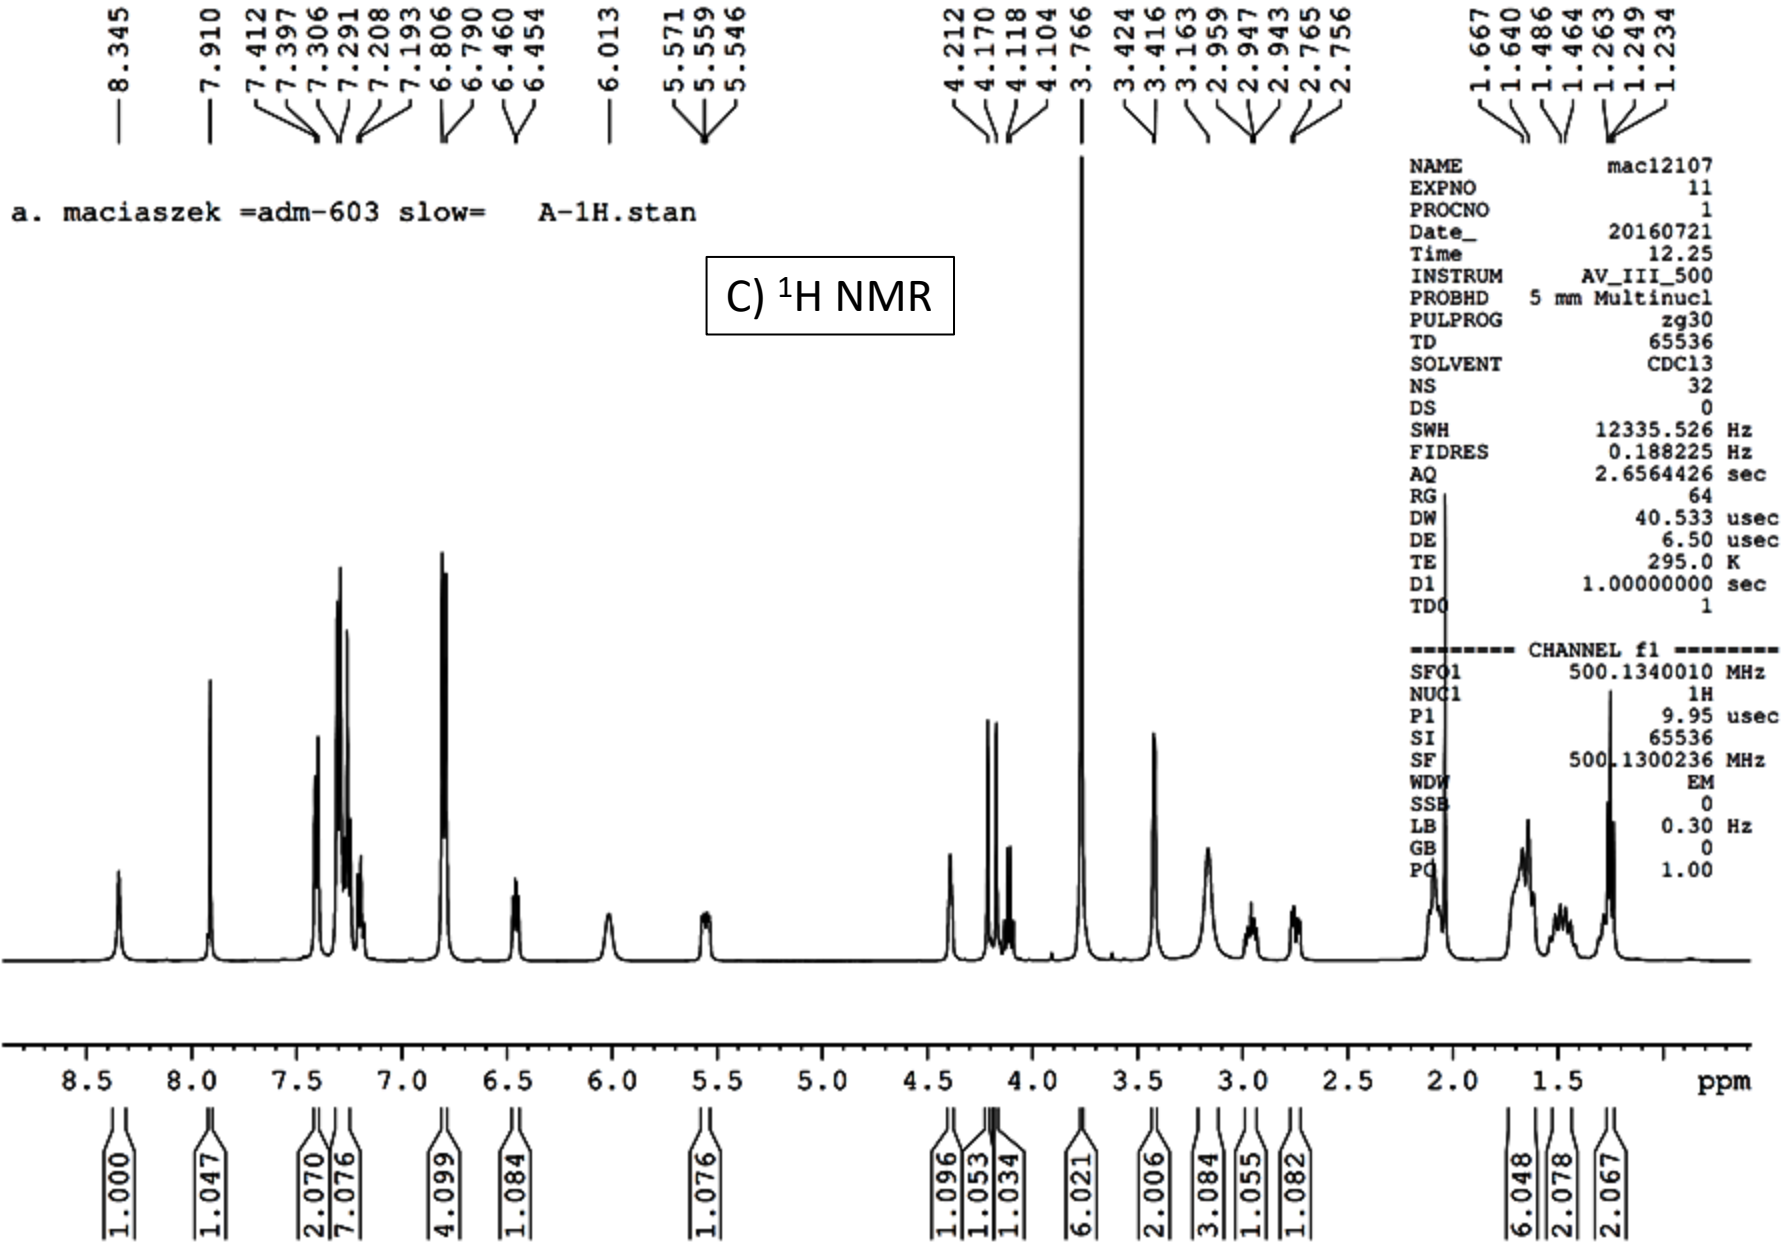

— 172.190  
 — 159.577  
 — 156.479  
 — 154.278  
 — 145.402  
 — 138.756  
 — 136.509  
 — 136.493  
 — 131.095  
 — 129.151  
 — 128.951  
 — 127.968  
 — 121.251  
 — 114.245

87.745  
 85.709  
 85.662  
 85.069  
 80.740  
 80.692  
 80.604  
 78.338  
 78.084  
 77.829  
 69.928  
 64.250  
 61.426  
 56.236

40.179  
 38.054  
 38.028  
 37.638  
 28.470  
 26.259  
 24.750  
 22.096  
 15.232

a. maciaszek =adm-603 slow= 13C{1H}

D) <sup>13</sup>C NMR

```

NAME          mac12107
EXPNO         12
PROCNO        1
Date_         20160721
Time          12.50
INSTRUM       AV_III_500
PROBHD        5 mm Multinucl
PULPROG       zgpg30
TD            65536
SOLVENT       CDC13
NS            1024
DS            0
SWH           36057.691 Hz
FIDRES        0.550197 Hz
AQ            0.9088159 sec
RG            2050
DW            13.867 usec
DE            6.50 usec
TE            295.0 K
D1            2.00000000 sec
D11           0.03000000 sec
TD0           2
  
```

```

----- CHANNEL f1 -----
SFO1          125.7728788 MHz
NUC1          13C
P1            11.00 usec
SI            32768
SF            125.7576643 MHz
WDW           EM
SSB           0
LB            2.00 Hz
GB            0
PC            1.40
  
```

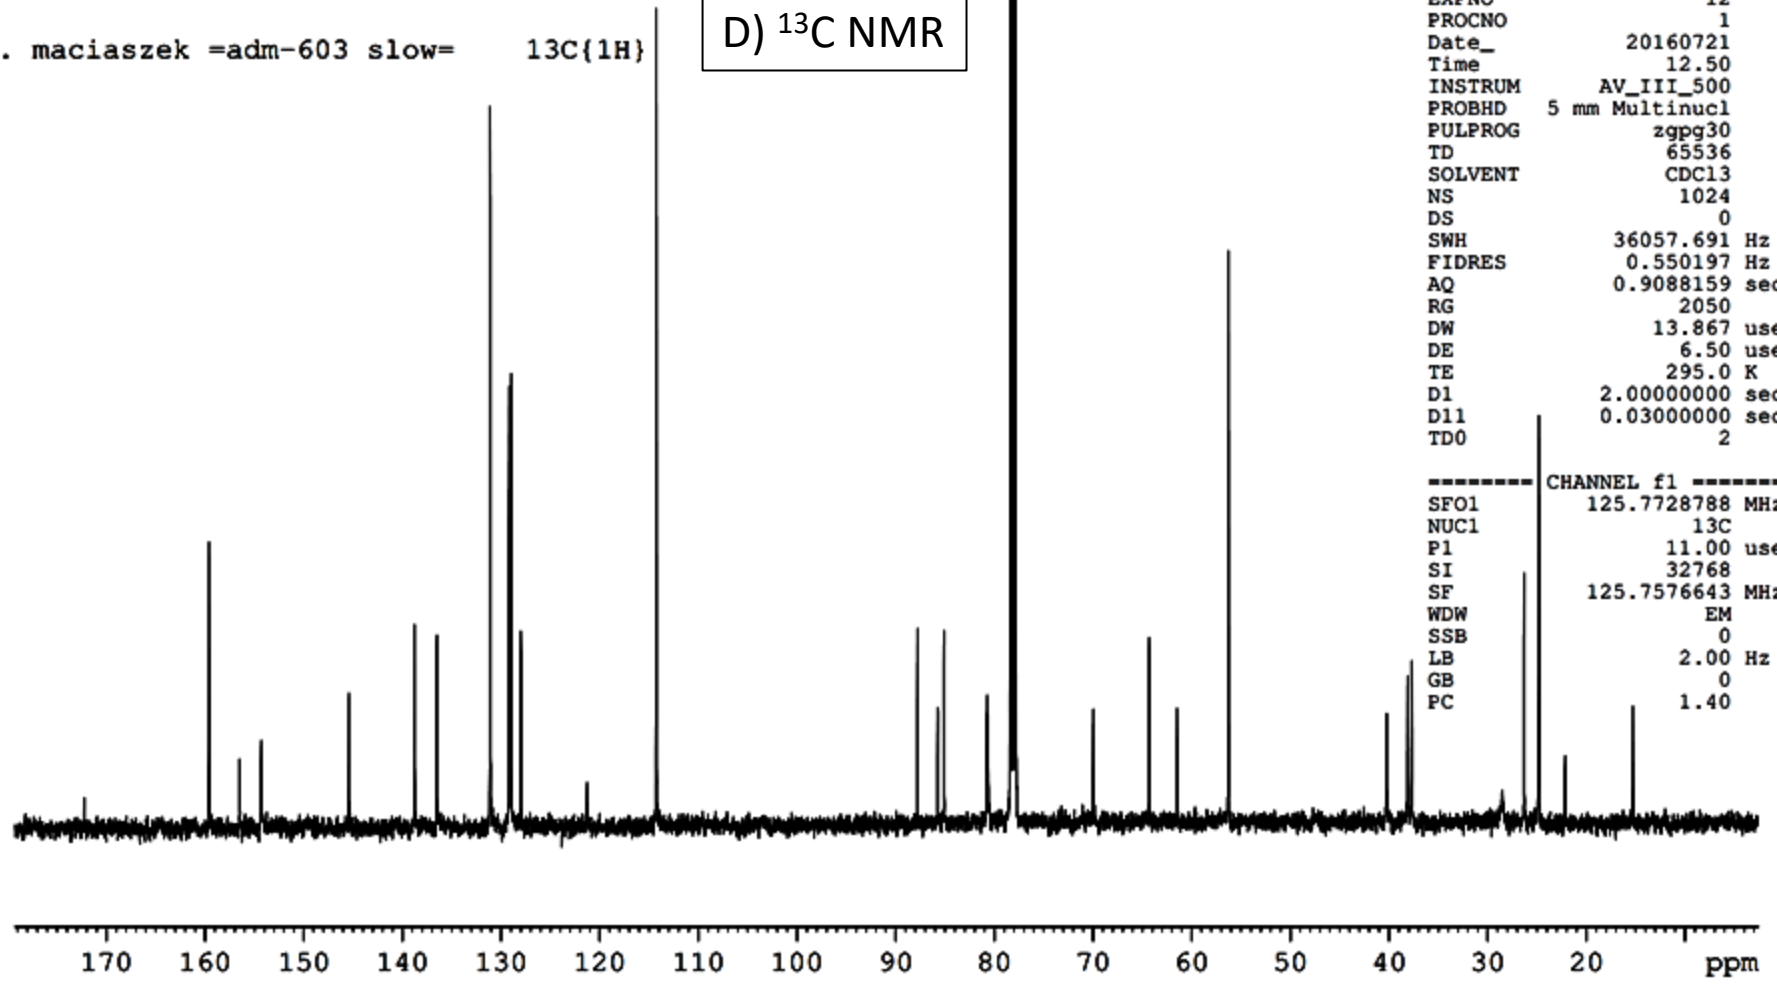

Figure 3S. Spectra for 5'-O-DMT- $N^2,N^2$ -dimethyl- $O^6$ -DPC-deoxyguanosine-3'-O-(2-thio-4,4-pentamethylene-1,3,2-oxathiaphospholane) – *fast* (**7f**)

A) HR MS

B)  $^{31}\text{P}$

C)  $^1\text{H}$  NMR

D)  $^{13}\text{C}$  NMR

# Elemental Composition Report

A) HR MS

## Single Mass Analysis

Tolerance = 2.5 PPM / DBE: min = -10.0, max = 60.0

Element prediction: Off

Number of isotope peaks used for i-FIT = 5

Monoisotopic Mass, Even Electron Ions

171 formula(e) evaluated with 1 results within limits (up to 50 closest results for each mass)

Elements Used:

C: 0-55 H: 0-65 N: 0-7 O: 2-8 P: 1-1 S: 0-3

180726\_ADM\_943 17 (0.197) Cm (11:37-(1:10+47:72))

1: TOF MS ES+

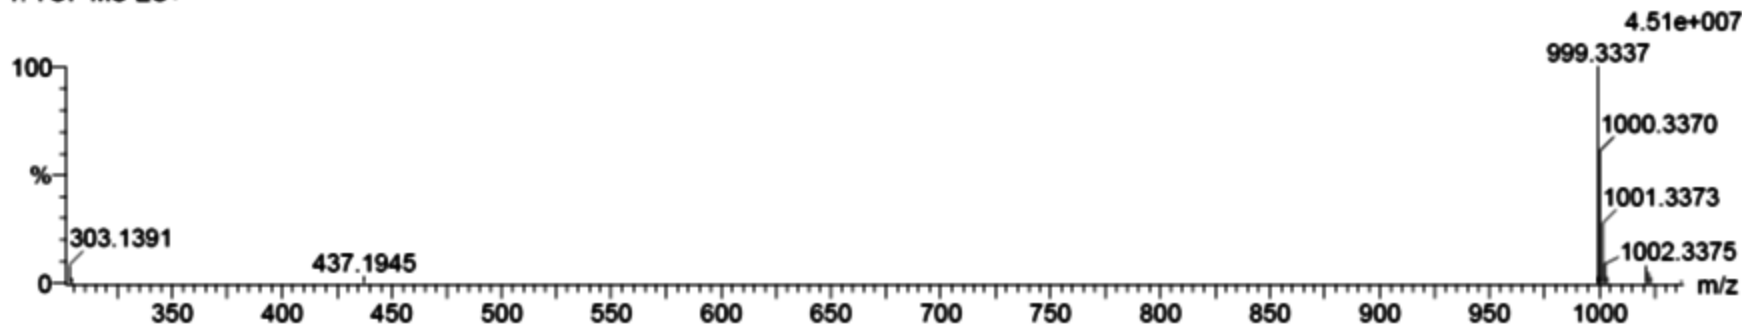

Minimum: -10.0  
Maximum: 15.0 2.5 60.0

| Mass     | Calc. Mass | mDa  | PPM  | DBE  | i-FIT | Norm | Conf (%) | Formula            |
|----------|------------|------|------|------|-------|------|----------|--------------------|
| 999.3337 | 999.3339   | -0.2 | -0.2 | 29.5 | 110.2 | n/a  | n/a      | C53 H56 N6 O8 P S2 |

a. maciaszek =adm-362 fast=

31P{1H}

104.55

B) <sup>31</sup>P NMR

```

Current Data Parameters
NAME          mac12802
EXPNO         11
PROCNO        1

F2 - Acquisition Parameters
Date_         20170301
Time          9.13
INSTRUM       AV_III_500
PROBHD        5 mm Multinucl
PULPROG       zgpg30
TD            65536
SOLVENT       CDCl3
NS            24
DS            0
SWH           96153.844 Hz
FIDRES        1.467191 Hz
AQ            0.3407872 sec
RG            2050
DW            5.200 usec
DE            6.50 usec
TE            295.0 K
D1            2.00000000 sec
D11           0.03000000 sec
TD0           1

----- CHANNEL f1 -----
SFO1          202.4563350 MHz
NUC1           31P
P1             12.00 usec
PLW1          80.00000000 W

----- CHANNEL f2 -----
SFO2          500.1324005 MHz
NUC2           1H
CPDPRG[2]     waltz16
PCPD2         100.00 usec
PLW2          10.00000000 W
PLW12         0.09900300 W
PLW13         0.09900300 W

F2 - Processing parameters
SI            32768
SF            202.4562968 MHz
WDW           EM
SSB           0
LB            2.00 Hz
GB            0
PC            1.40

```

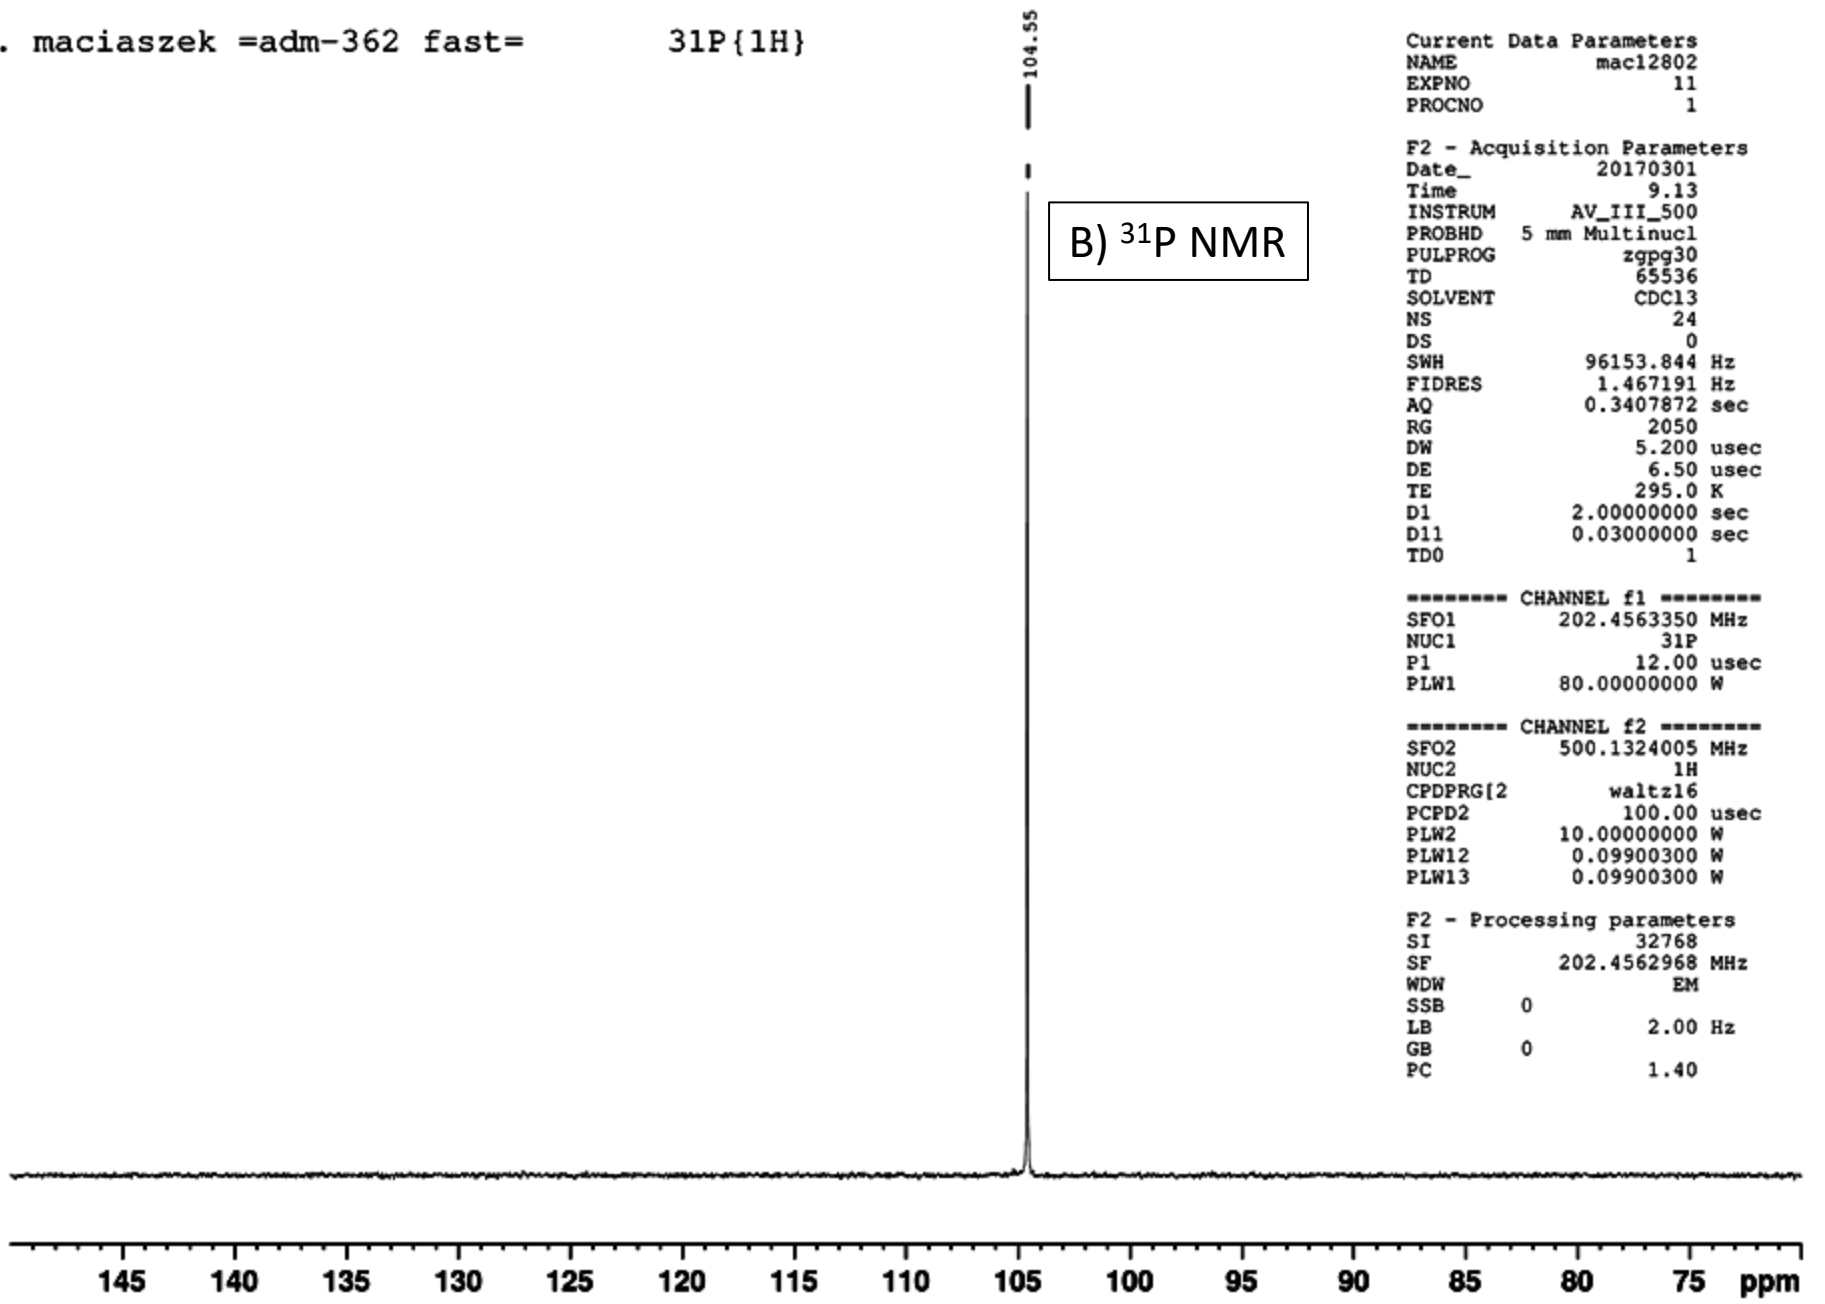

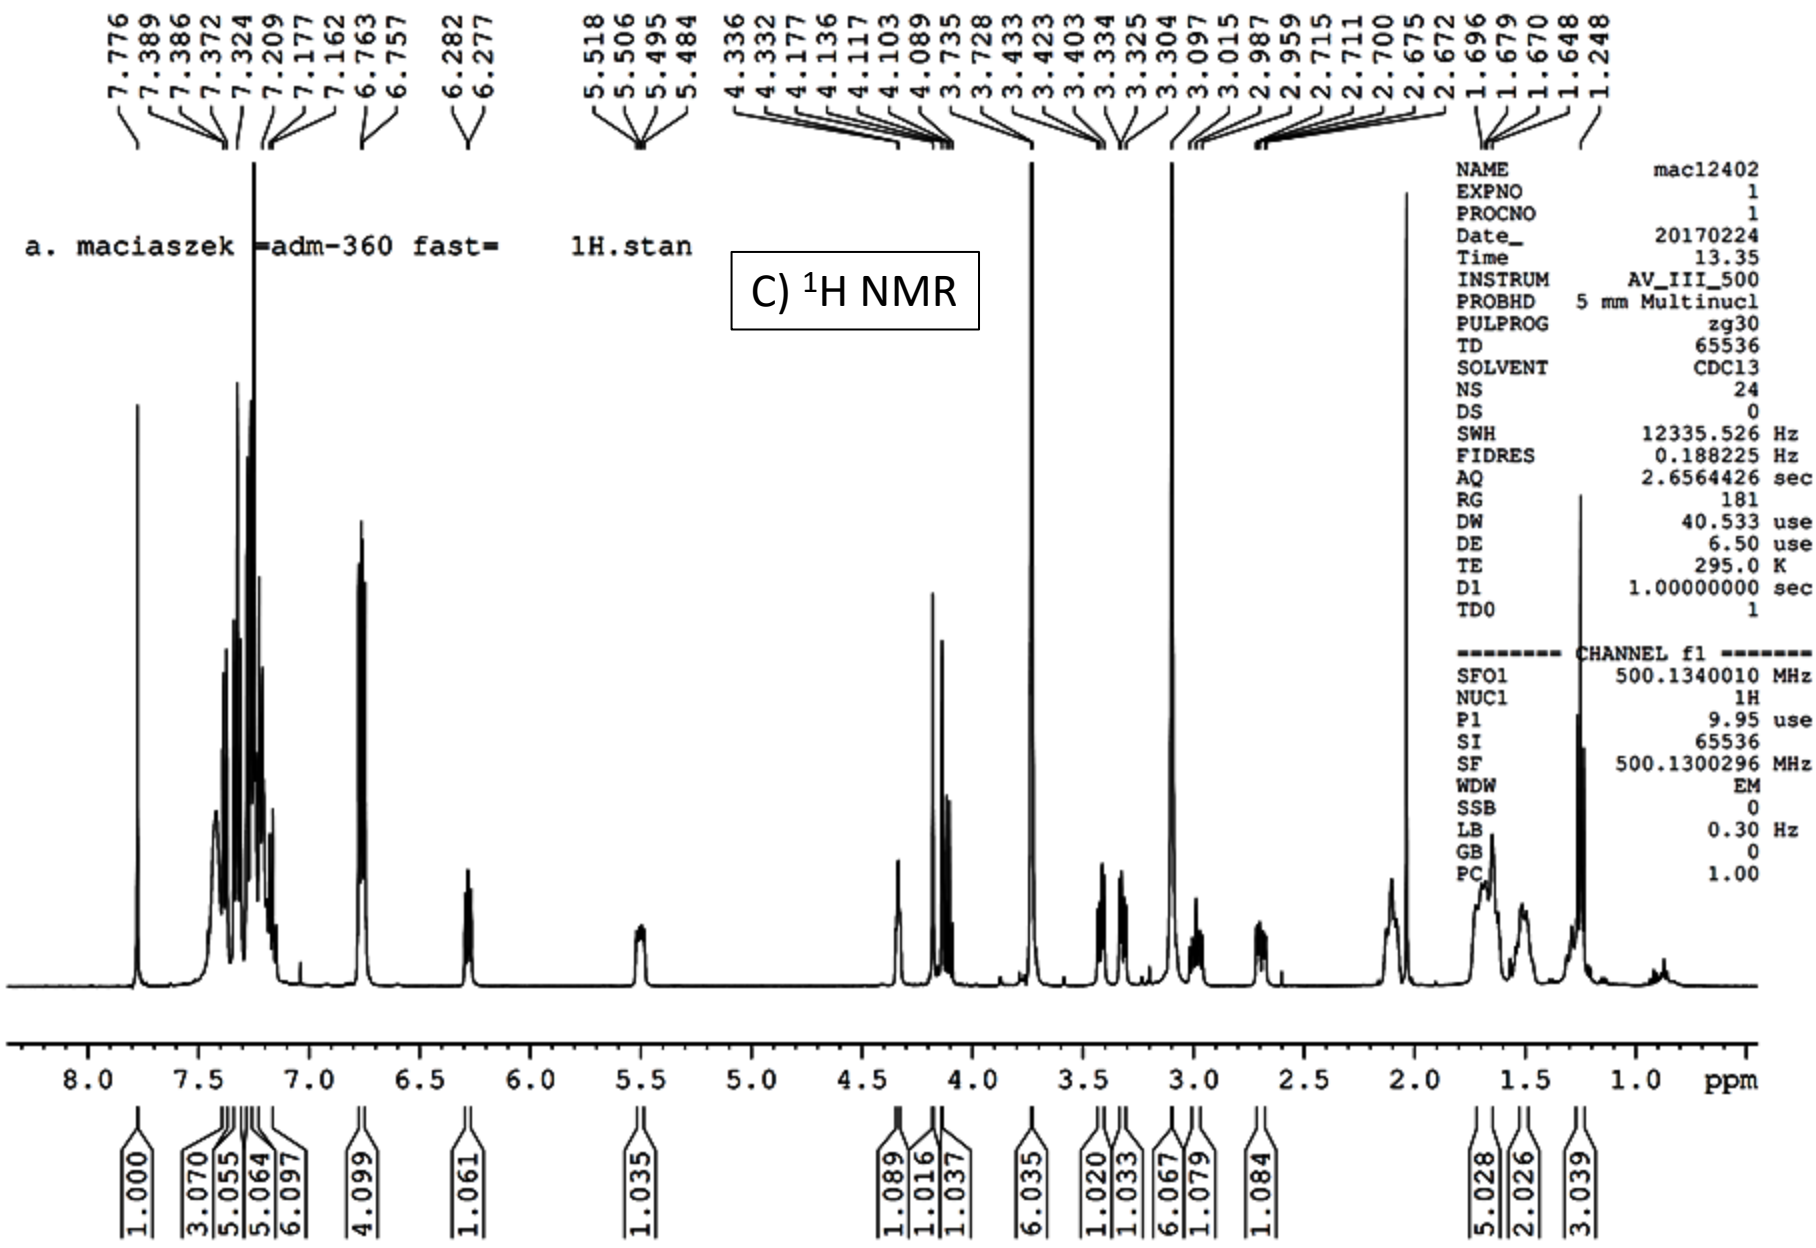



159.184  
 158.459  
 155.788  
 155.536  
 151.044  
 144.375  
 142.120  
 139.259  
 135.474  
 135.435  
 129.980  
 128.964  
 128.038  
 127.850  
 126.836  
 116.719  
 113.149

86.558  
 84.885  
 84.836  
 84.000  
 79.740  
 79.692  
 79.514  
 77.255  
 77.001  
 76.747  
 68.791  
 63.371  
 60.356  
 55.142

37.756  
 37.593  
 36.841  
 36.810  
 36.645  
 25.180  
 23.731  
 23.643

a. maciaszek =adm-362 fast= 13C{1H}

D) <sup>13</sup>C NMR

```

NAME      mac12802
EXPNO     2
PROCNO    1
Date_     20170228
Time      16.44
INSTRUM   AV_III_500
PROBHD    5 mm Multinucl
PULPROG   zgpg30
TD         65536
SOLVENT   CDCl3
NS         7424
DS         0
SWH       36057.691 Hz
FIDRES    0.550197 Hz
AQ        0.9088159 sec
RG         2050
DW        13.867 usec
DE         6.50 usec
TE         295.0 K
D1         3.0000000 sec
D11        0.0300000 sec
TD0        29
  
```

```

----- CHANNEL f1 -----
SFO1     125.7691072 MHz
NUC1      13C
P1        11.00 usec
SI        32768
SF        125.7578003 MHz
WDW       EM
SSB       0
LB        2.00 Hz
GB        0
PC        1.40
  
```

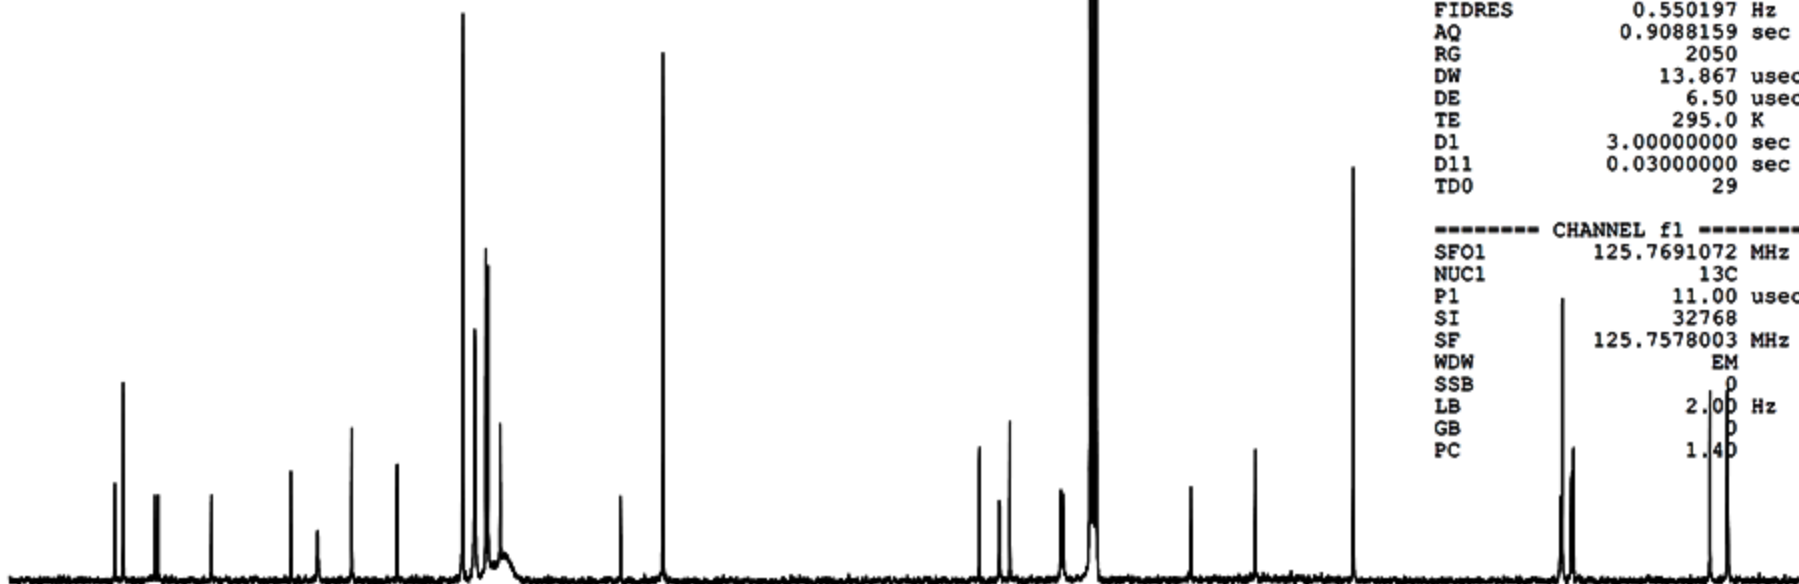

160 150 140 130 120 110 100 90 80 70 60 50 40 30 ppm

Figure 4S. Spectra for 5'-O-DMT- $N^2,N^2$ -dimethyl- $O^6$ -DPC-deoxyguanosine-3'-O-(2-thio-4,4-pentamethylene-1,3,2-oxathiaphospholane)  
– *fast (7s)*

A) HR MS

B)  $^{31}\text{P}$

C)  $^1\text{H}$  NMR

D)  $^{13}\text{C}$  NMR

# Elemental Composition Report

## Single Mass Analysis

A) HR MS

Tolerance = 2.5 PPM / DBE: min = -10.0, max = 60.0

Element prediction: Off

Number of isotope peaks used for i-FIT = 5

Monoisotopic Mass, Even Electron Ions

171 formula(e) evaluated with 1 results within limits (up to 50 closest results for each mass)

Elements Used:

C: 0-55 H: 0-65 N: 0-7 O: 2-8 P: 1-1 S: 0-3

180726\_ADM\_944 17 (0.197) Cm (12:28-(1:11+44:72))

1: TOF MS ES+

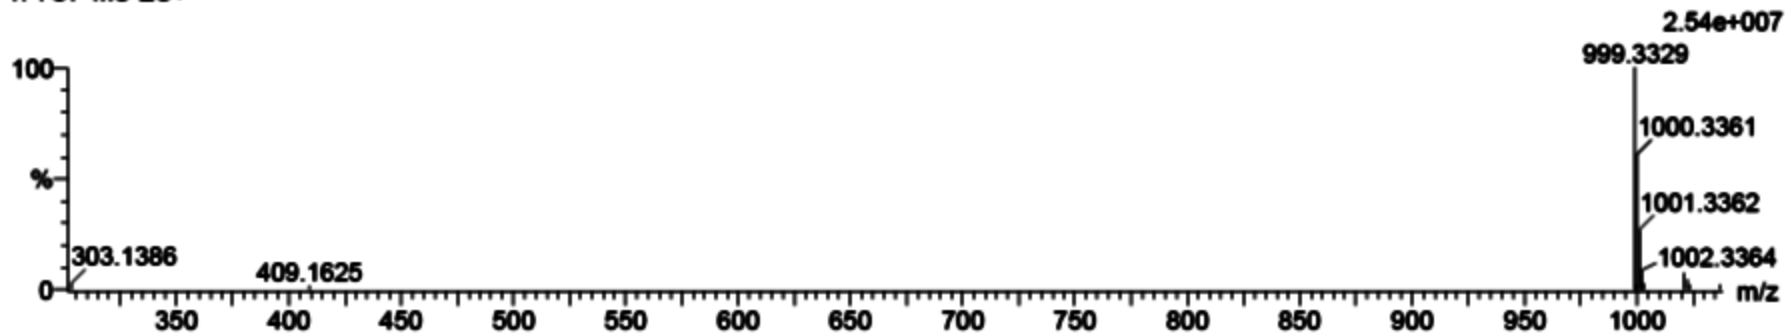

Minimum: -10.0  
Maximum: 15.0 2.5 60.0

| Mass     | Calc. Mass | mDa  | PPM  | DBE  | i-FIT | Norm | Conf (%) | Formula            |
|----------|------------|------|------|------|-------|------|----------|--------------------|
| 999.3329 | 999.3339   | -1.0 | -1.0 | 29.5 | 79.2  | n/a  | n/a      | C53 H56 N6 O8 P S2 |

a. maciaszek =adm-363 slow= 31P{1H}

105.088

B) <sup>31</sup>P NMR

Current Data Parameters  
NAME mac12802  
EXPNO 12  
PROCNO 1

F2 - Acquisition Parameters  
Date\_ 20170301  
Time 9.06  
INSTRUM AV\_III\_500  
PROBHD 5 mm Multinucl  
PULPROG zgpg30  
TD 65536  
SOLVENT CDCl3  
NS 32  
DS 0  
SWH 96153.844 Hz  
FIDRES 1.467191 Hz  
AQ 0.3407872 sec  
RG 2050  
DW 5.200 usec  
DE 6.50 usec  
TE 295.0 K  
D1 2.0000000 sec  
D11 0.03000000 sec  
TD0 1

===== CHANNEL f1 =====  
SFO1 202.4563350 MHz  
NUC1 31P  
P1 12.00 usec  
PLW1 80.00000000 W

===== CHANNEL f2 =====  
SFO2 500.1324005 MHz  
NUC2 1H  
CPDPRG[2] waltz16  
PCPD2 100.00 usec  
PLW2 10.00000000 W

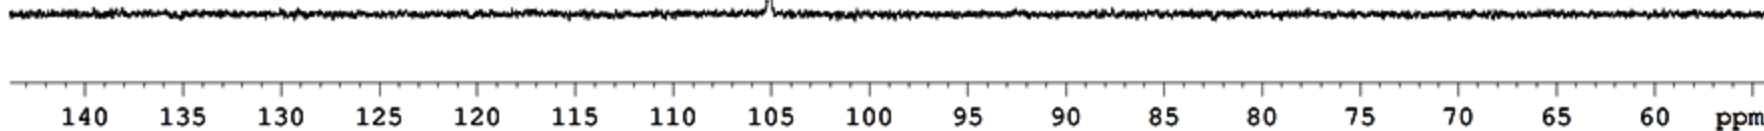

a. maciaszek adm-361 slow= 1H.stan

C) <sup>1</sup>H NMR

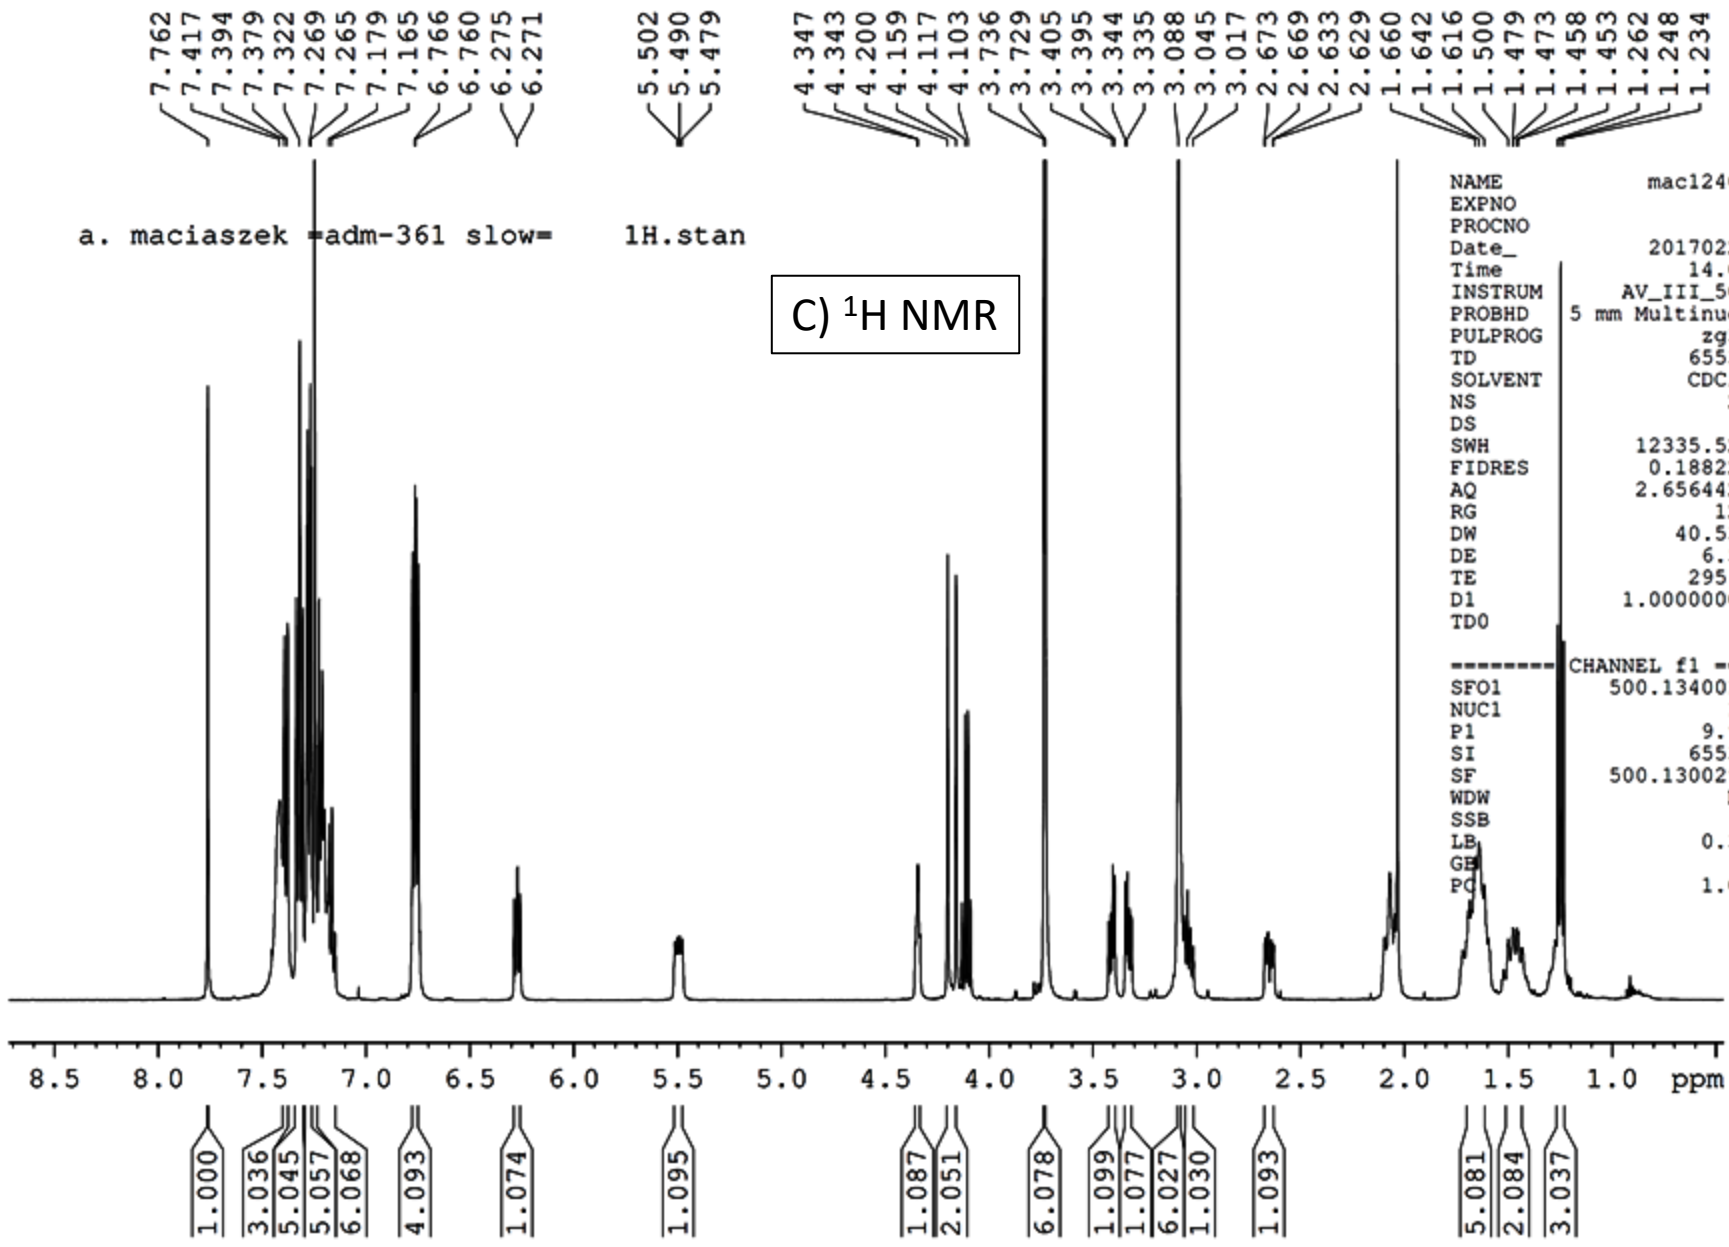

```

NAME          mac12402
EXPNO         3
PROCNO        1
Date_         20170224
Time          14.02
INSTRUM       AV_III_500
PROBHD        5 mm Multinucl
PULPROG       zg30
TD            65536
SOLVENT       CDC13
NS            24
DS            0
SWH           12335.526 Hz
FIDRES        0.188225 Hz
AQ            2.6564426 sec
RG            128
DW            40.533 usec
DE            6.50 usec
TE            295.0 K
D1            1.00000000 sec
TDO           1

----- CHANNEL f1 -----
SF01          500.1340010 MHz
NUC1          1H
P1            9.95 usec
SI            65536
SF            500.1300296 MHz
WDW           EM
SSB           0
LB            0.30 Hz
GB            0
PC            1.00
  
```

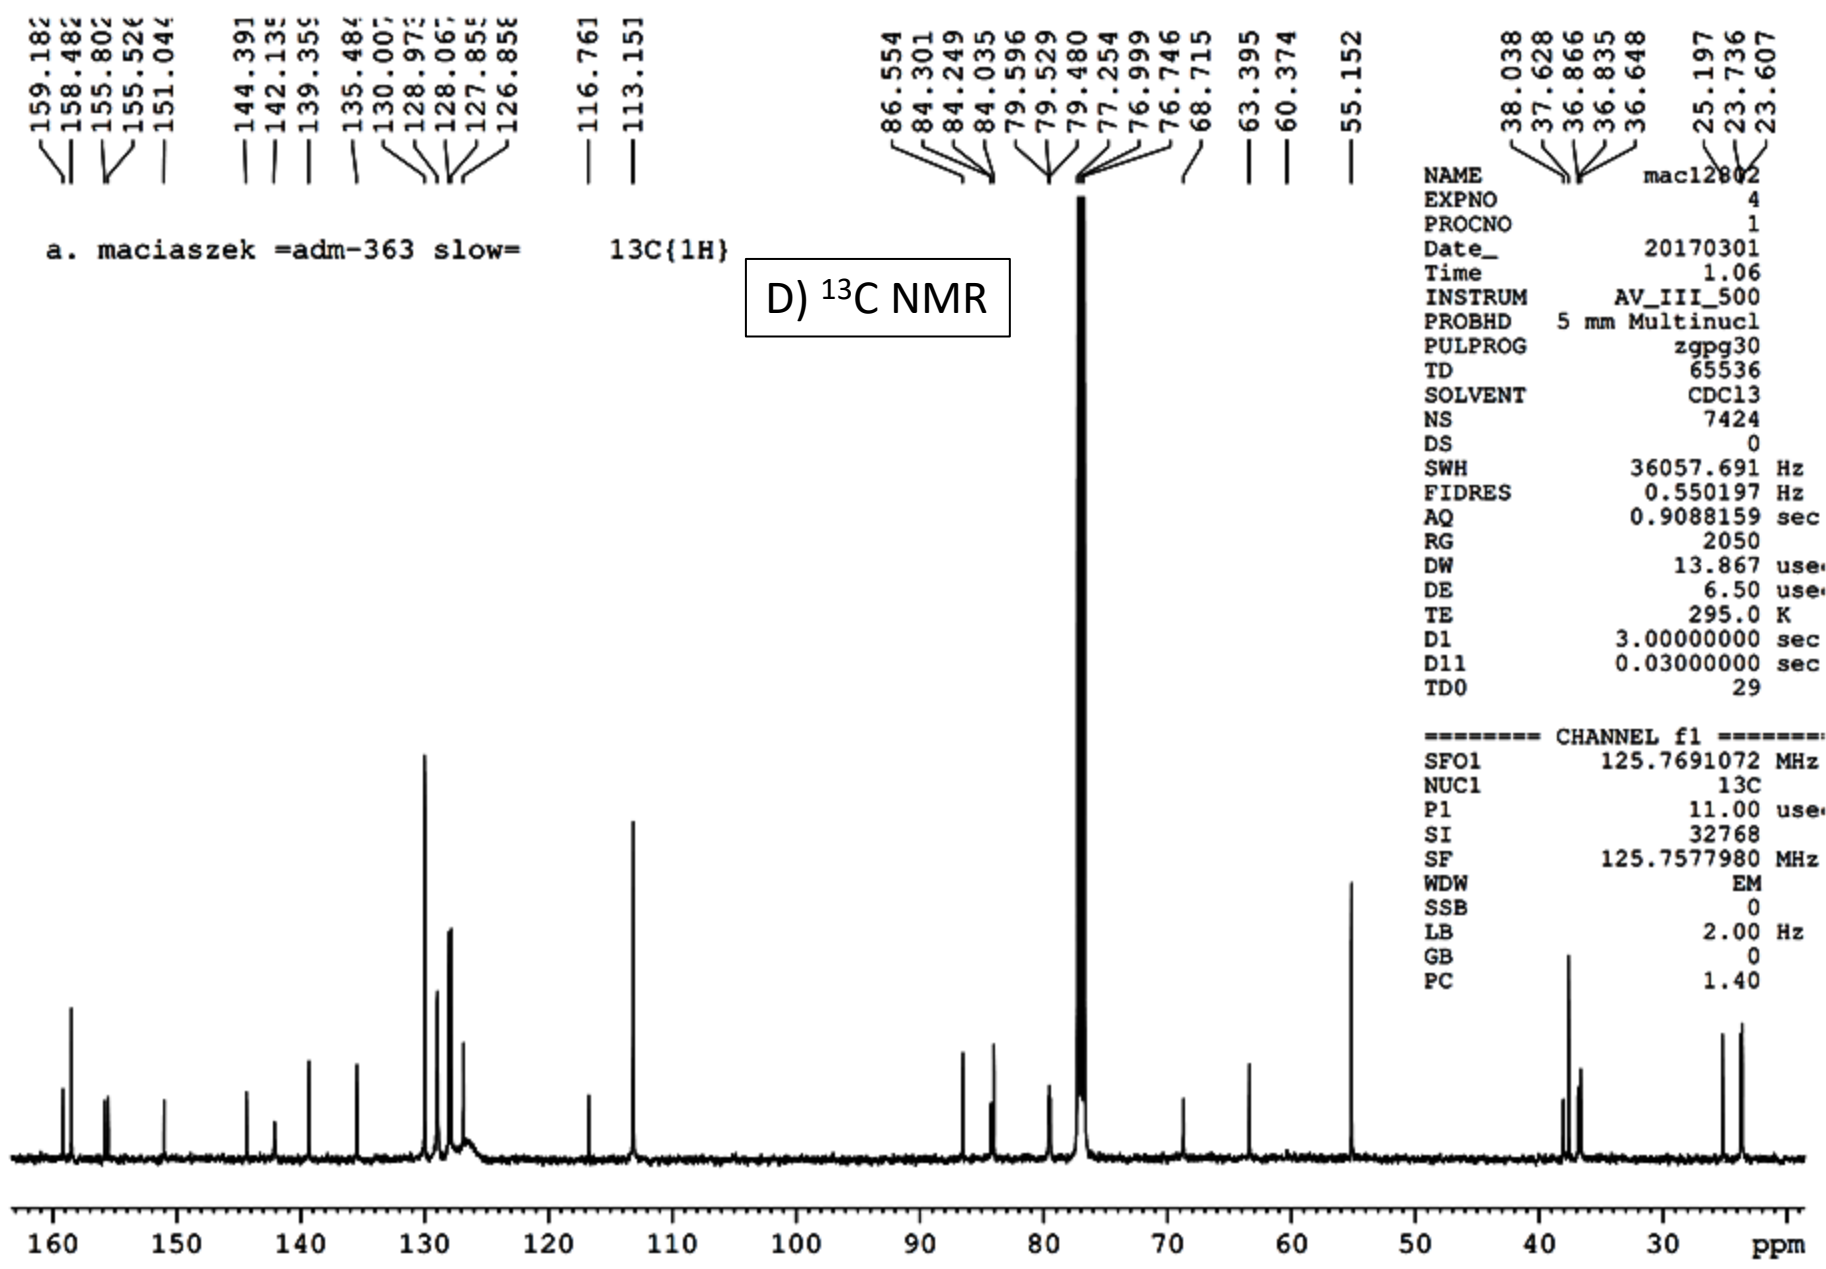

```

NAME mac12802
EXPNO 4
PROCNO 1
Date_ 20170301
Time 1.06
INSTRUM AV_III_500
PROBHD 5 mm Multinucl
PULPROG zgpg30
TD 65536
SOLVENT CDCl3
NS 7424
DS 0
SWH 36057.691 Hz
FIDRES 0.550197 Hz
AQ 0.9088159 sec
RG 2050
DW 13.867 usec
DE 6.50 usec
TE 295.0 K
D1 3.00000000 sec
D11 0.03000000 sec
TD0 29

----- CHANNEL f1 -----
SF01 125.7691072 MHz
NUC1 13C
P1 11.00 usec
SI 32768
SF 125.7577980 MHz
WDW EM
SSB 0
LB 2.00 Hz
GB 0
PC 1.40

```

Figure 5S. MALDI-TOF mass spectra recorded for  $N^X_{PS}T$  (**10f,s** and **11f,s**).

- A) dinucleoside 3',5'-phosphorothioate **10f**
- B) dinucleoside 3',5'-phosphorothioate **103**
- C) dinucleoside 3',5'-phosphorothioate **11f**
- D) dinucleoside 3',5'-phosphorothioate **11s**

ADM-942 Maciaszek A ; ref neg.

Matrix: HPA 50 mg/mL H<sub>2</sub>O/ACN 1:1 v/v, AC 50 mg/mL H<sub>2</sub>O/ACN 1:1 v/v; HPA/AC 8:1

Data: gh490001.H14[c] 9 Mar 2016 11:52 Cal: T\_3\_T\_6\_K\_REF 20 May 2011 10:50

Shimadzu Biotech Axima Performance 2.9.1.20100121: Mode Reflectron\_neg, Power: 104, Blanked, P.Ext. @ 600 (bin 47)

%Int. 140 mV[sum= 7439 mV] Profiles 1-53 Smooth Av 5 -Baseline 1000

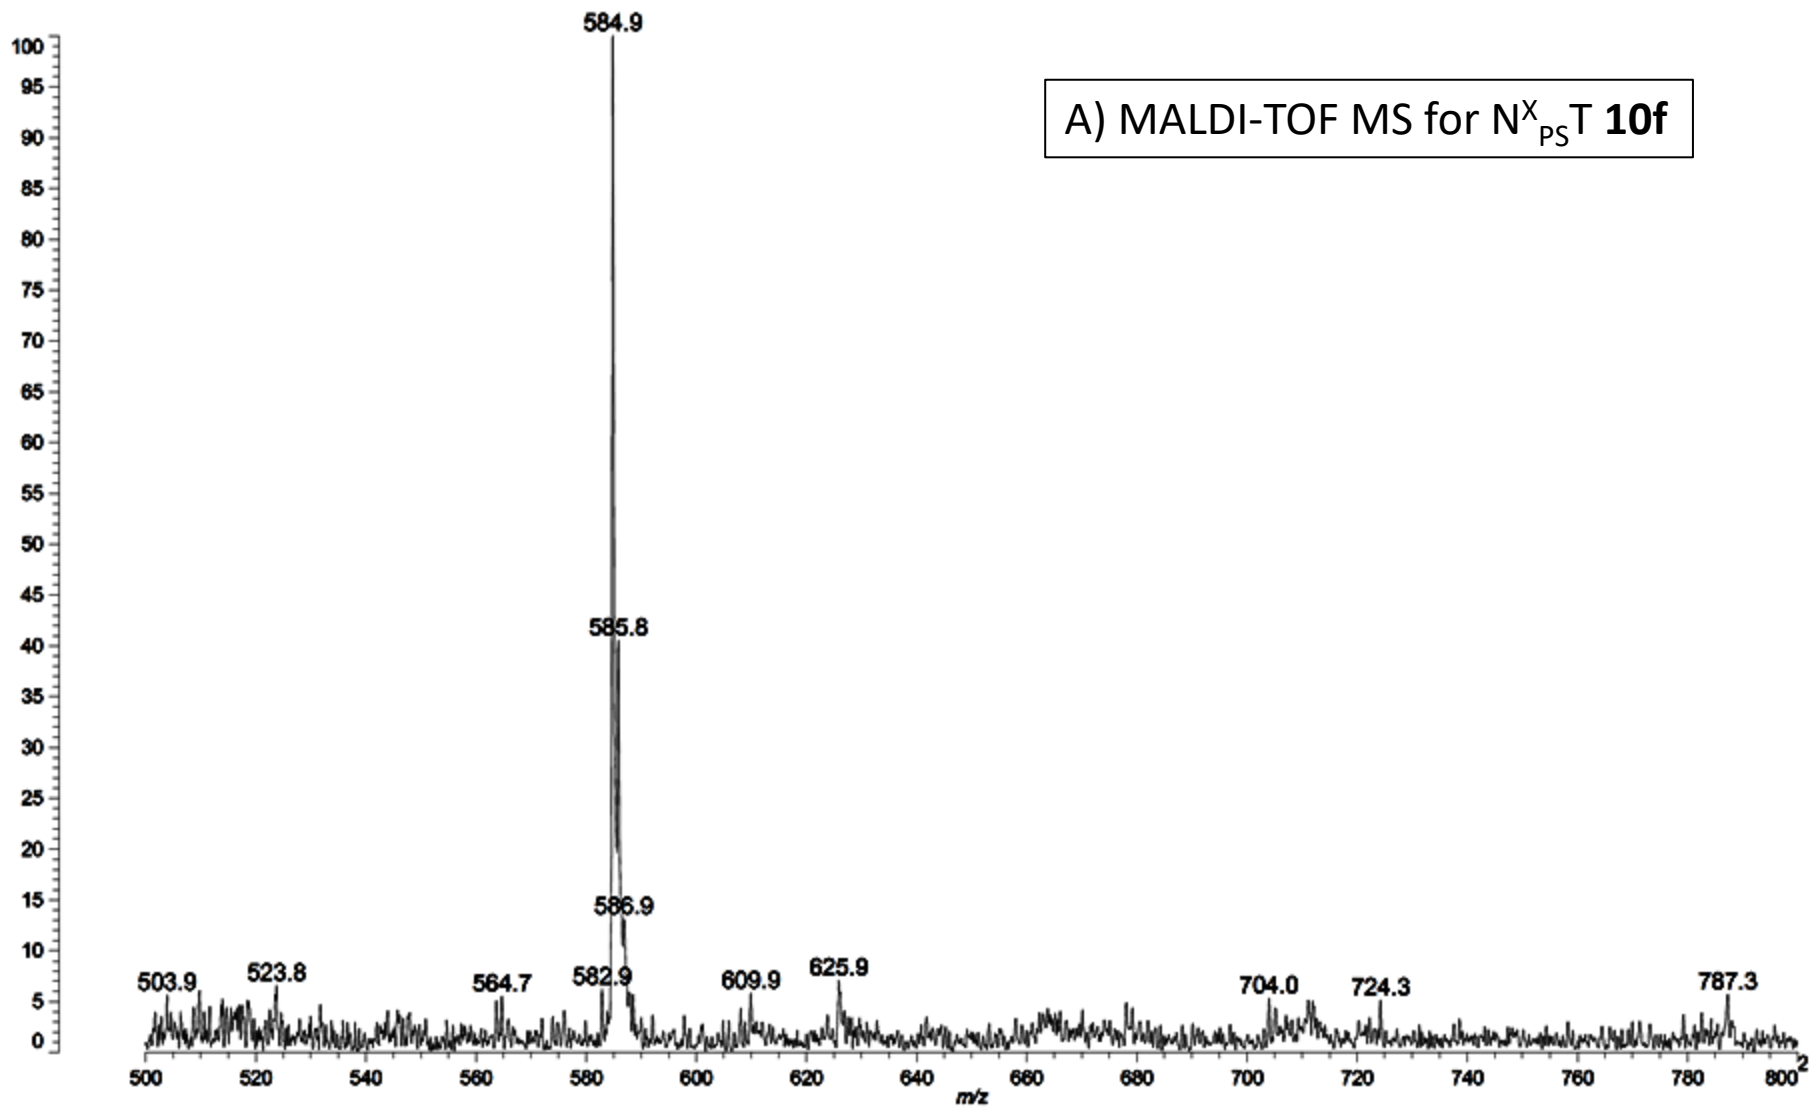



ADM-943 Maciaszek A ; ref neg.  
Matrix: HPA 50 mg/mL H2O/ACN 1:1 v/v, AC 50 mg/mL H2O/ACN 1:1 v/v; HPA/AC 8:1  
Data: gh500001.H16(c) 9 Mar 2016 11:56 Cal: T\_3\_T\_6\_K\_REF 20 May 2011 10:50  
Shimadzu Biotech Axima Performance 2.9.1.20100121: Mode Reflectron\_neg, Power: 105, Blanked, P.Ext. @ 600 (bin 47)  
%Int. 14 mV[sum= 1569 mV] Profiles 1-115 Smooth Av 5 -Baseline 1000

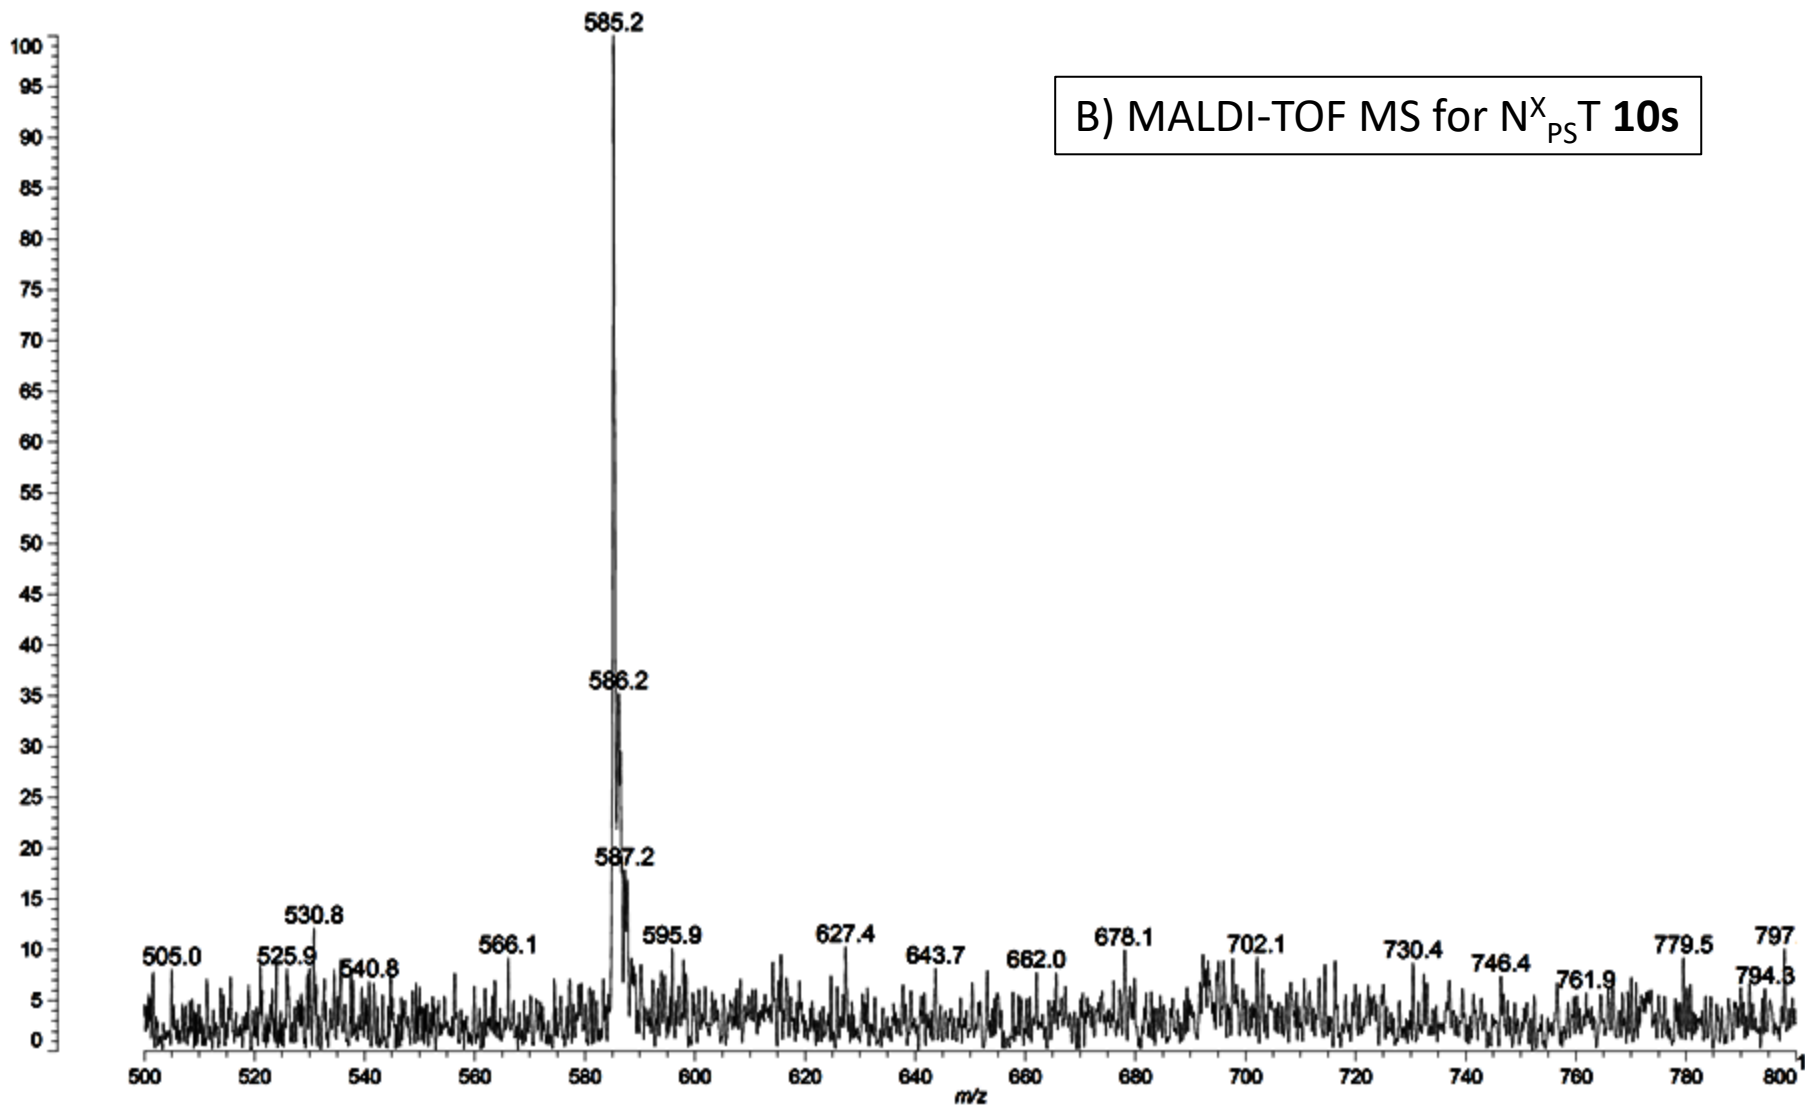

C) MALDI-TOF MS for N<sup>X</sup><sub>PS</sub>T **11f**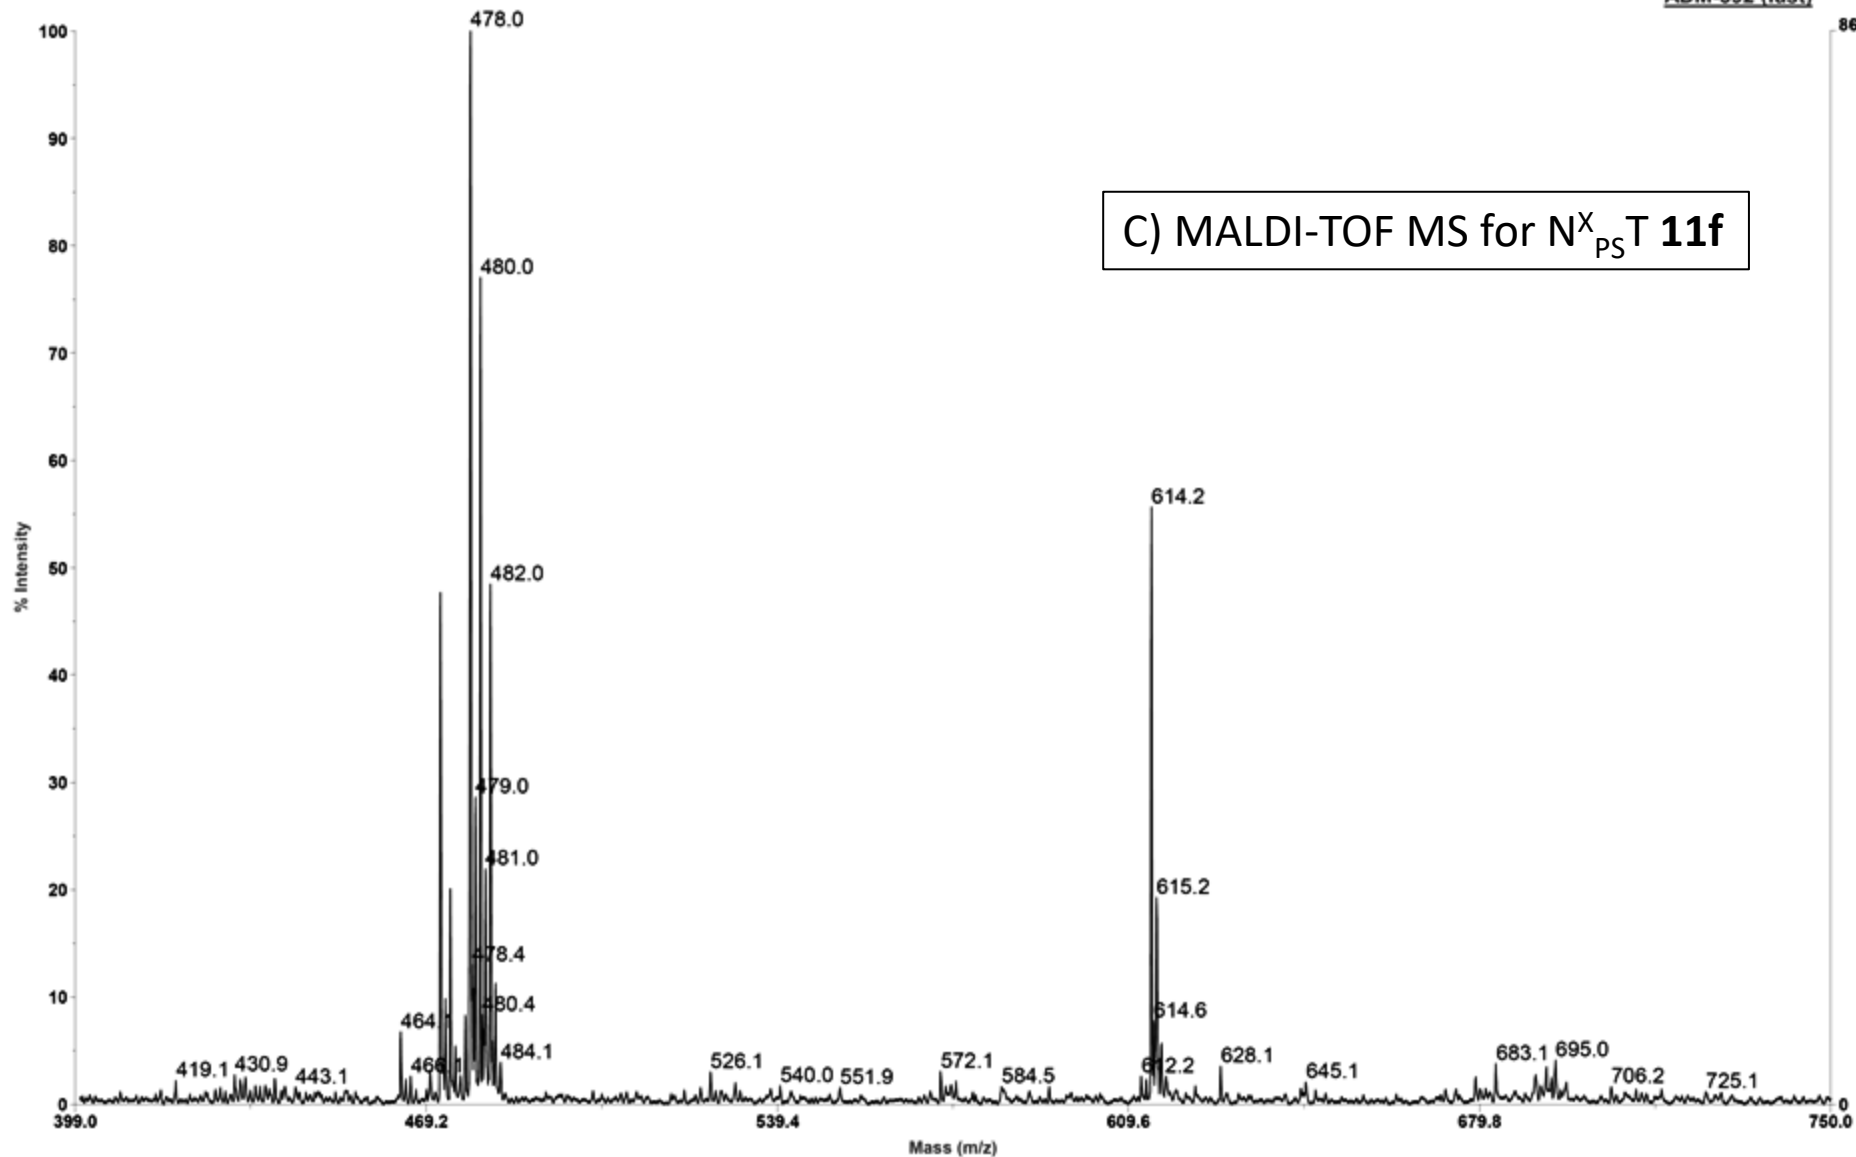

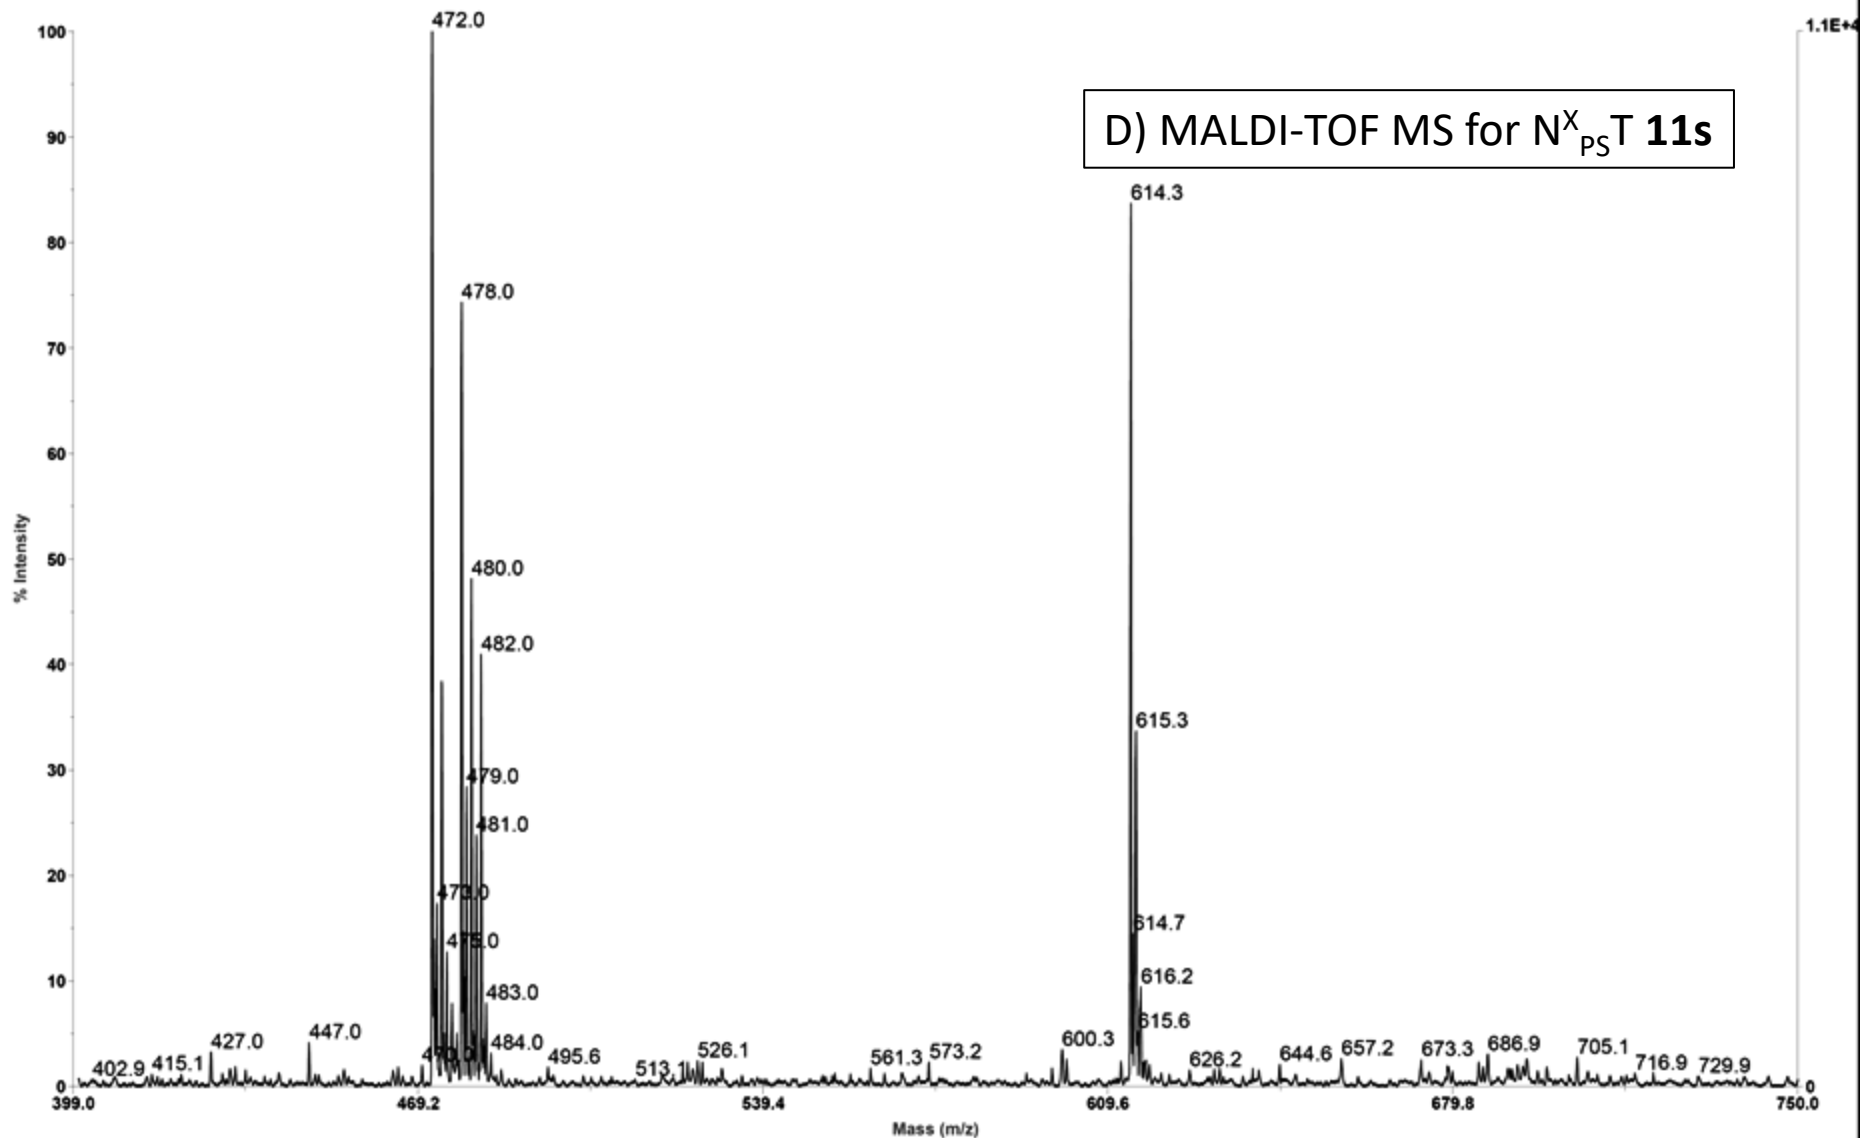

Figure 6S. MALDI-TOF mass spectra recorded for chimeric ( $R_p$ -PS)- and ( $S_p$ -PS)-DN( $N^x$ )A oligomers

A) Oligomer **13R**

B) Oligomer **13S**

C) Oligomer **14R**

D) Oligomer **14S**

E) Oligomer **15R**



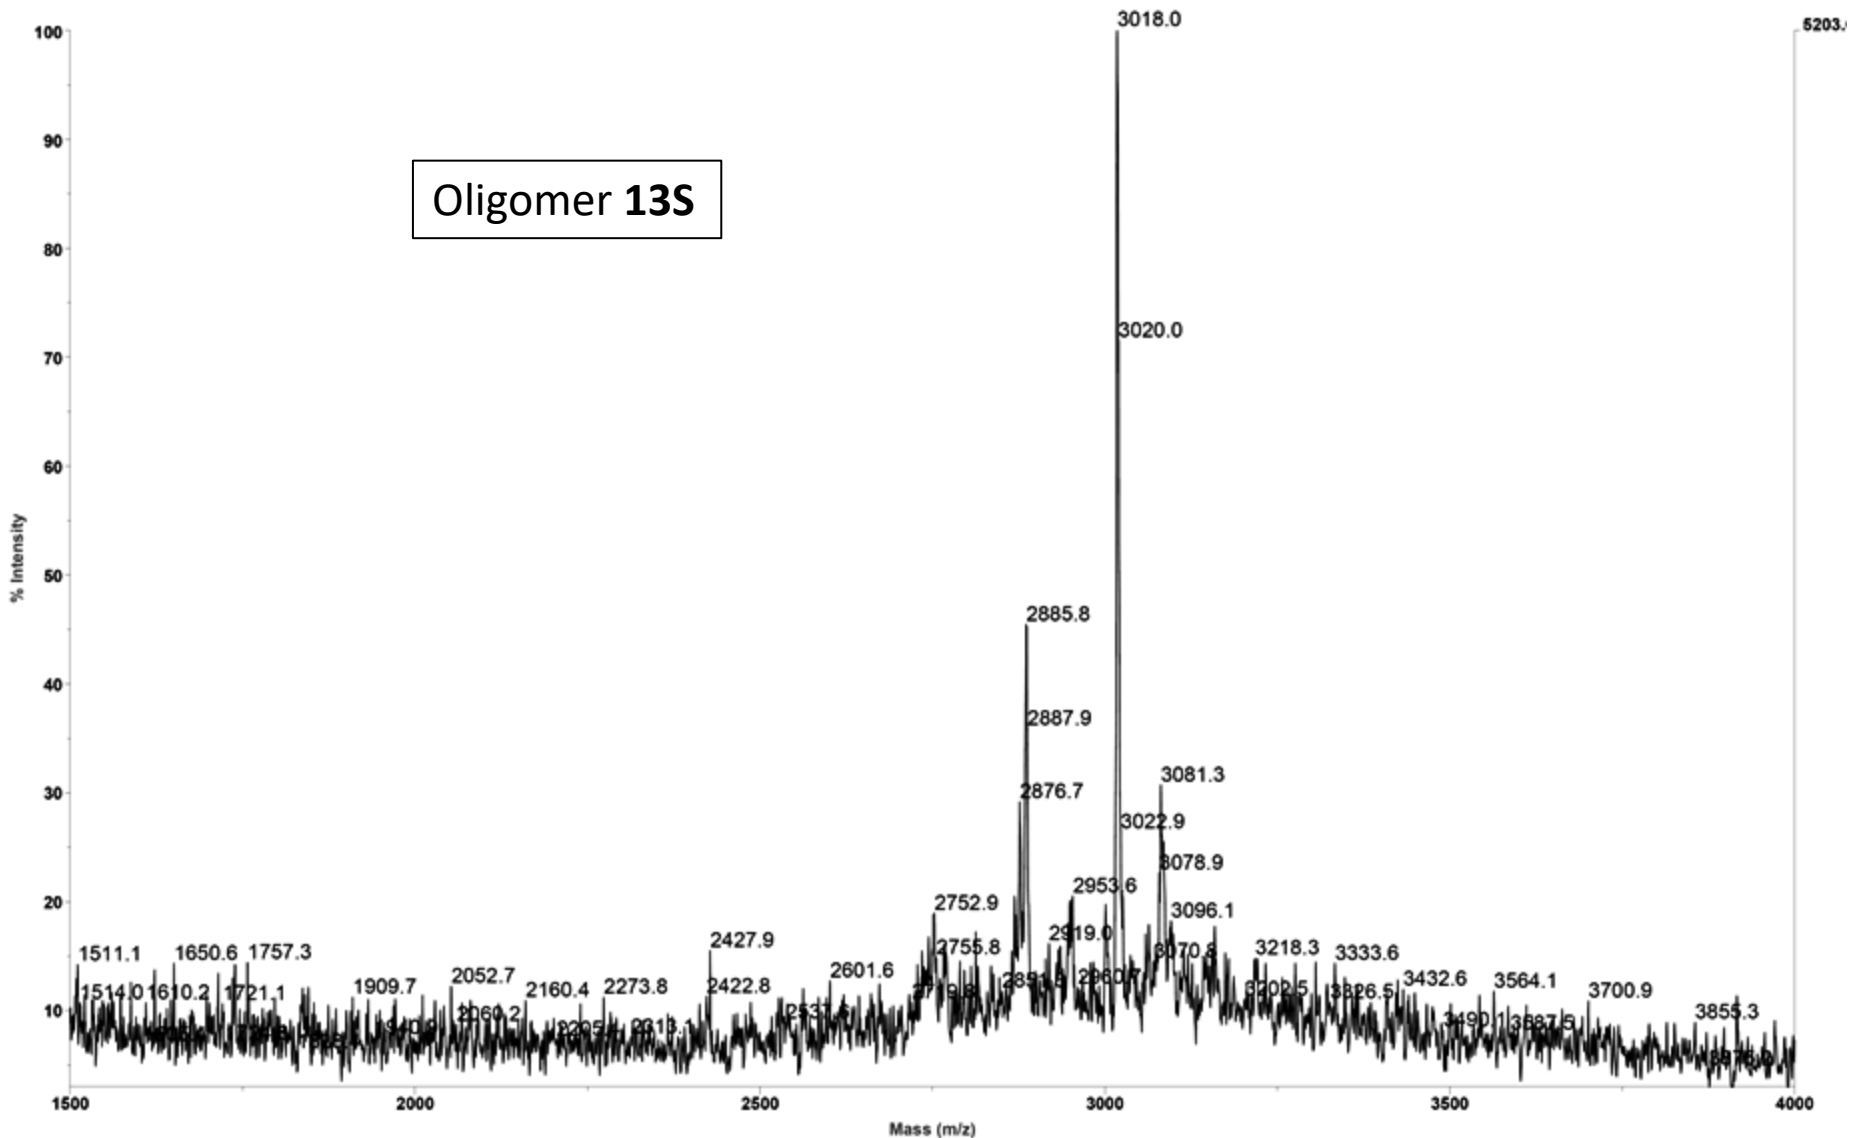

Oligomer 14R

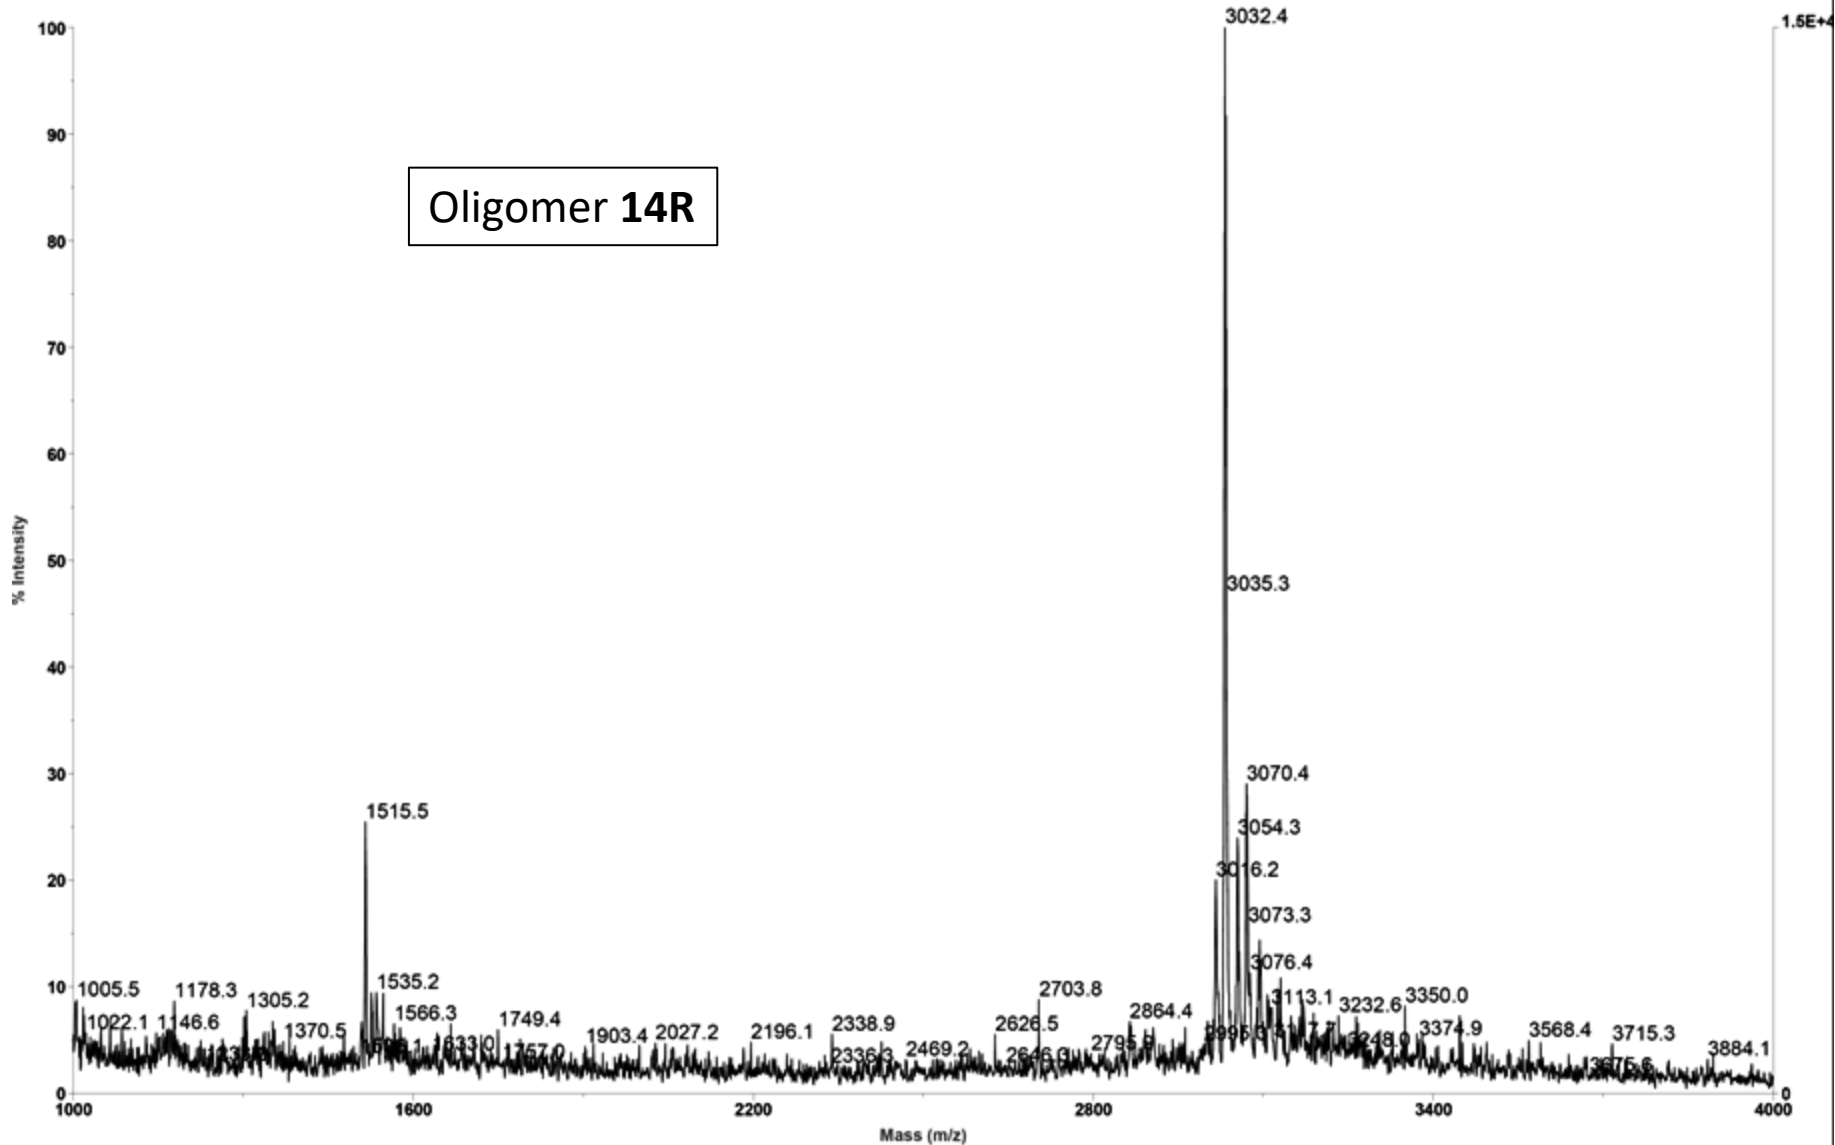

LMaciaszek, ADM-623, 0,01 OD (ACN/H2O 1:1), [HPA, 3-hydroxypicolinic acid, 50 mg/mL in 50% ACN/H2O / AC, ammonium citrate dibasic, 50 mg/mL in H2O - 8:1 (v/v)]  
E:\...gt910003.dat  
Acquired: 12:47:00, September 05, 2017

ADM-641; A.Maciaszek; lin neg

Matrix: HPA 50 mg/mL H<sub>2</sub>O/ACN 1:1 v/v, AC 50 mg/mL H<sub>2</sub>O/ACN 1:1 v/v; HPA/AC 8:1

Data: g730001.L17[c] 27 Jul 2017 16:36 Cal: LIN\_NEG 13 May 2010 11:44

%Int. 79 mV[sum= 3069 mV] Profiles 1-39 Smooth Av 15 -Baseline 1000

Oligomer 14S

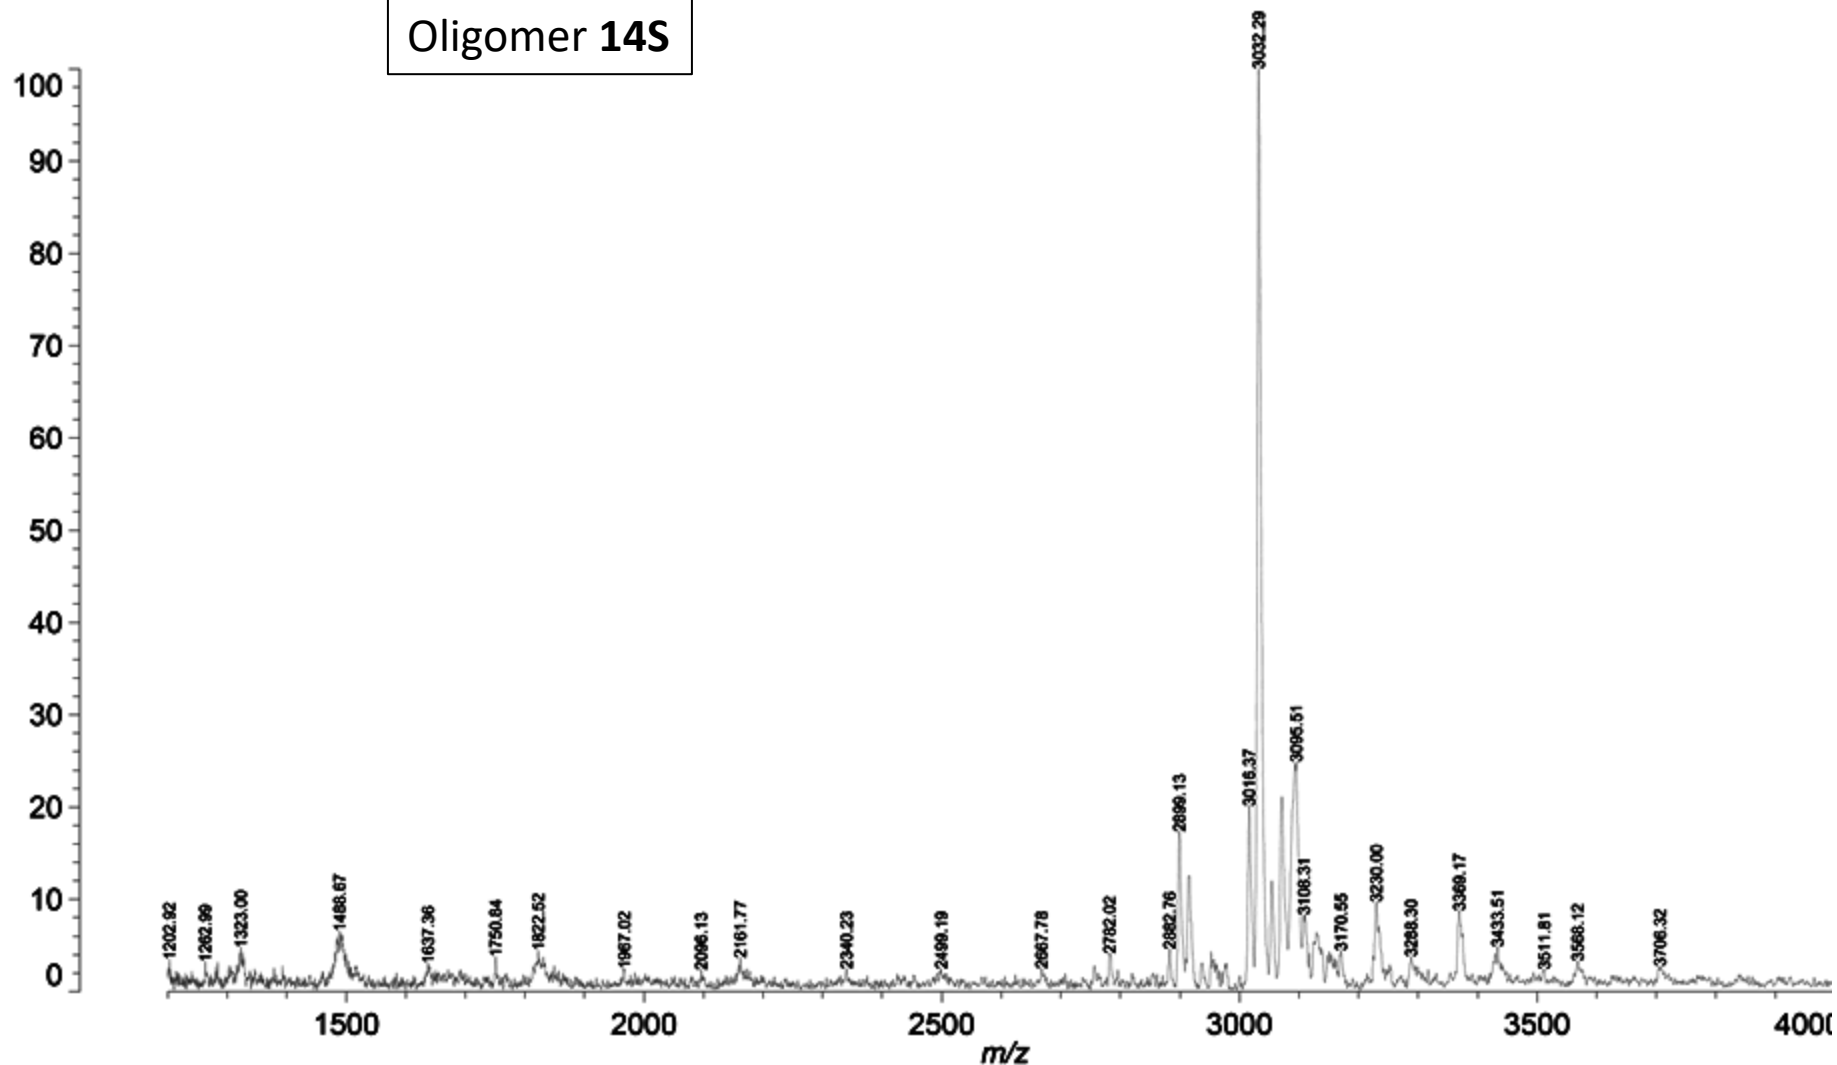



190226\_N6CH3\_dA\_12\_Rp 69 (0.711) M1 [Ev-594606,It10] (Gs,1.600,650:2000,0.01,L33,R33); Sb (20,2.00 ); Cm (4:96)

1: TOF MS ES-  
2.50e5

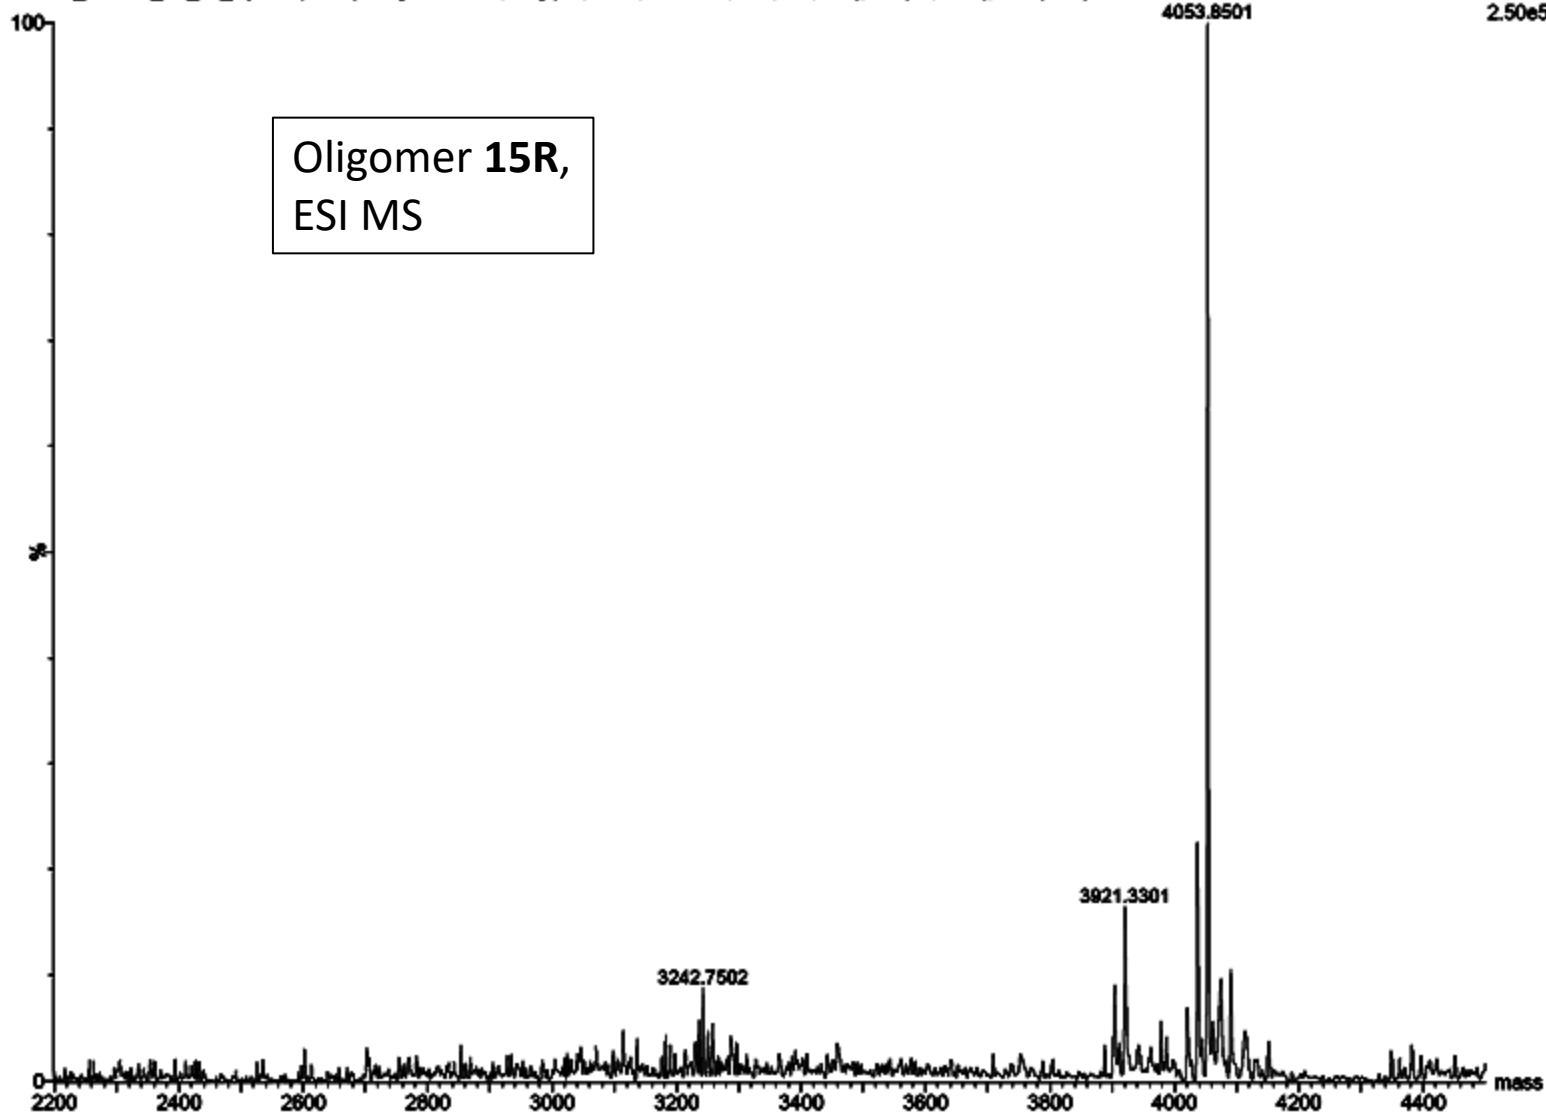

Figure 7S. The melting curves recorded at pH 7.2 for **15R** mixed with **hR12** and/or **wR12**. No inflection point was detected.,

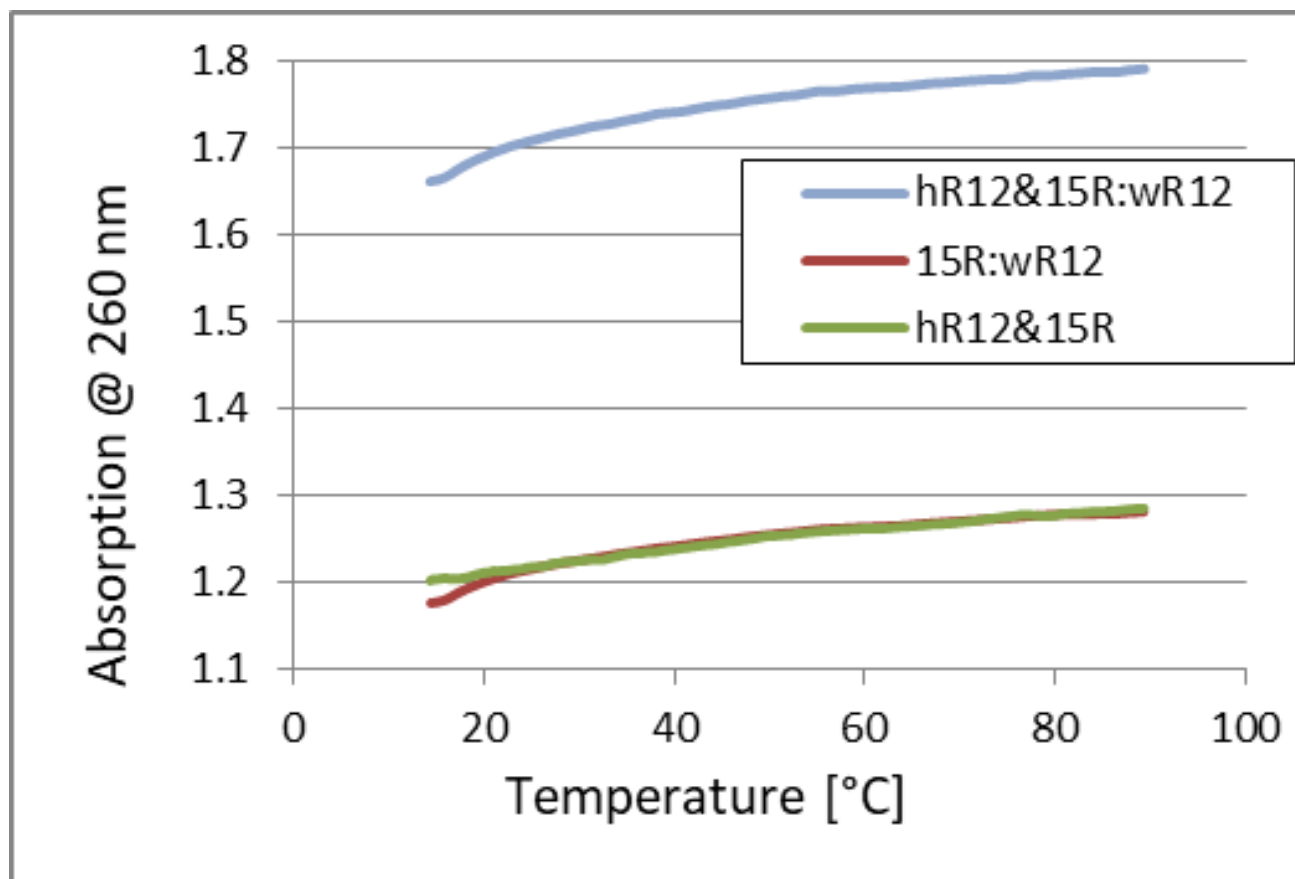

Figure 8S. The melting curves recorded at pH 5.4 for **15R** mixed with **hR12** and/or **wR12**. No inflection point was detected. Curves recorded for **15R** mixed with **wD12** and **16R** mixed with **hR12** are given as a reference.

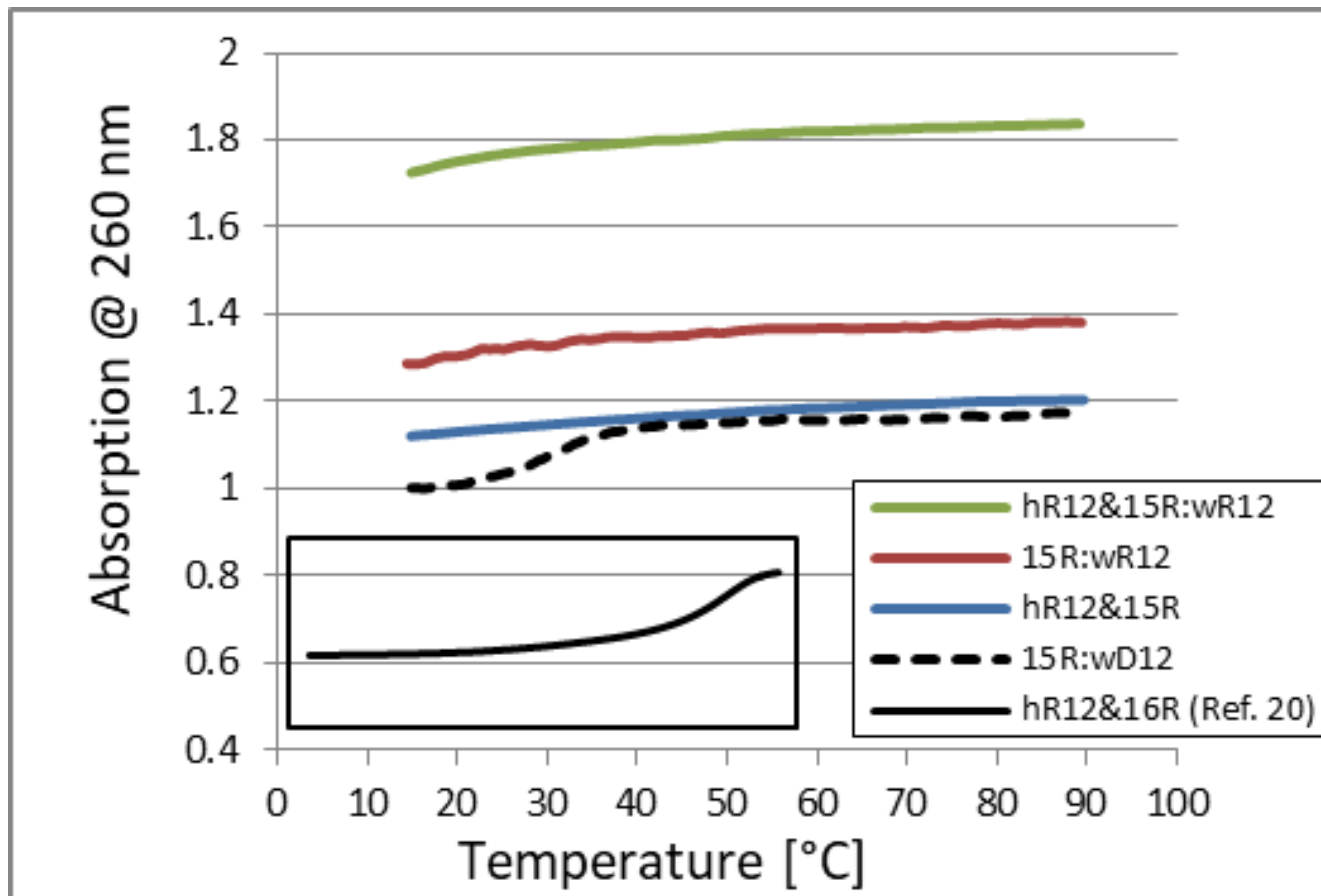

Figure 9S. The melting curves recorded at pH 7.2 or 5.4 for **15R** mixed with **wM12** and a plot of 1° derivative  $dA/dT$  for the pH 5.4 curve.

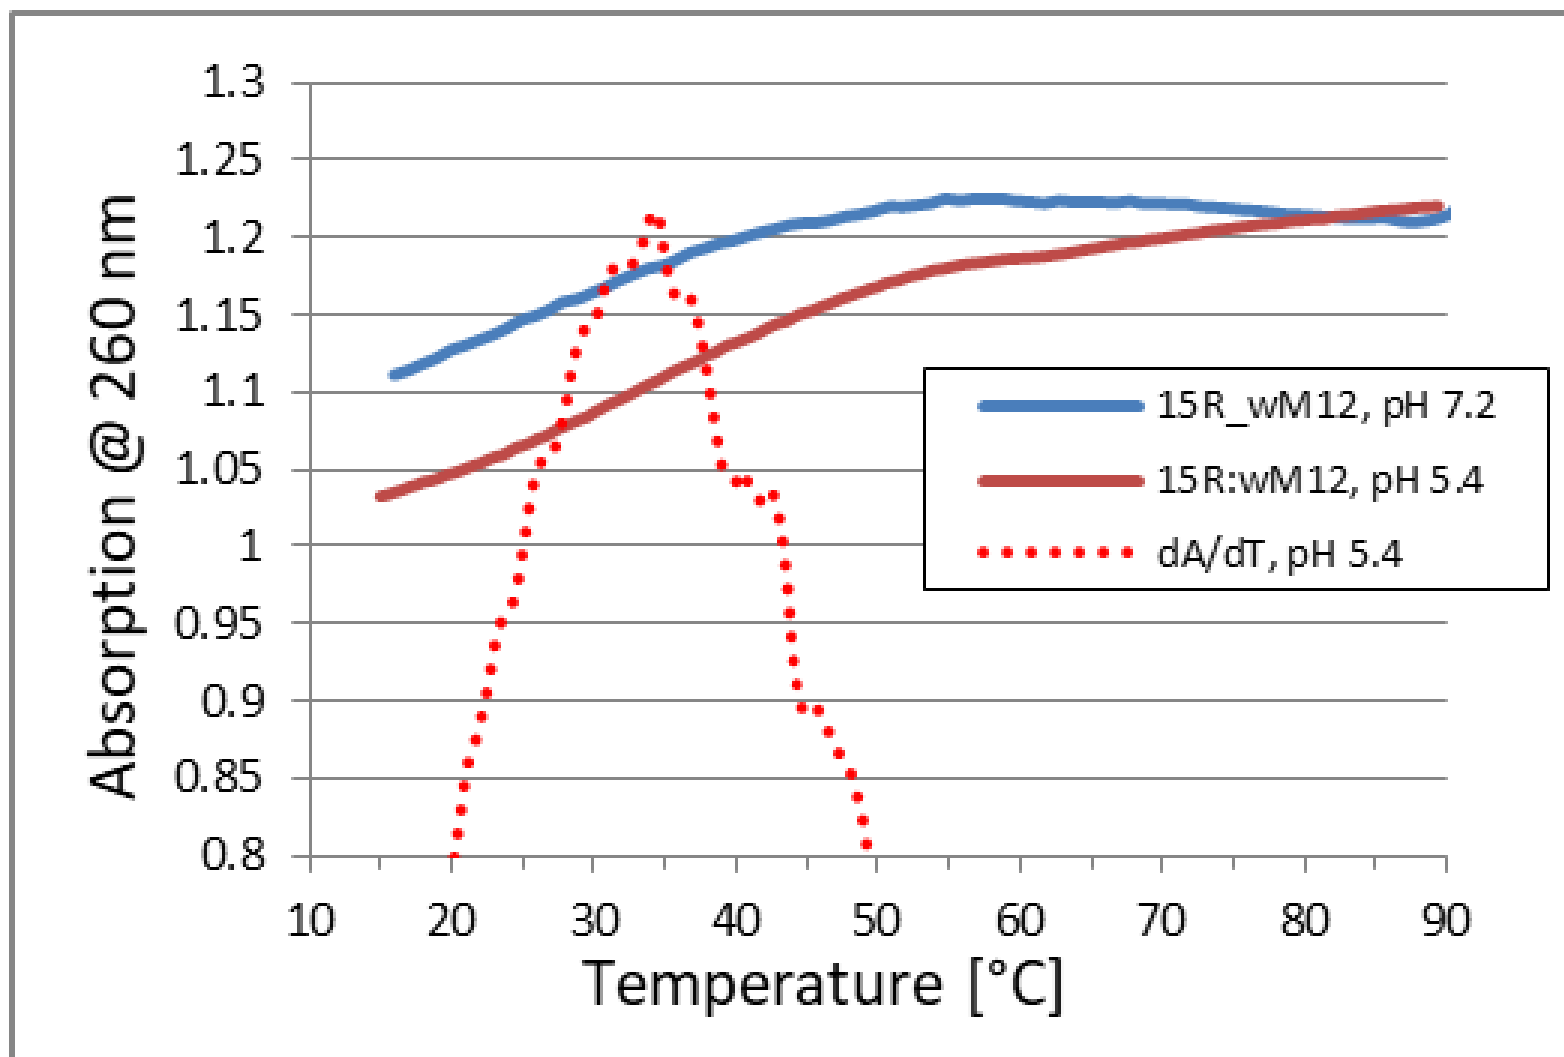

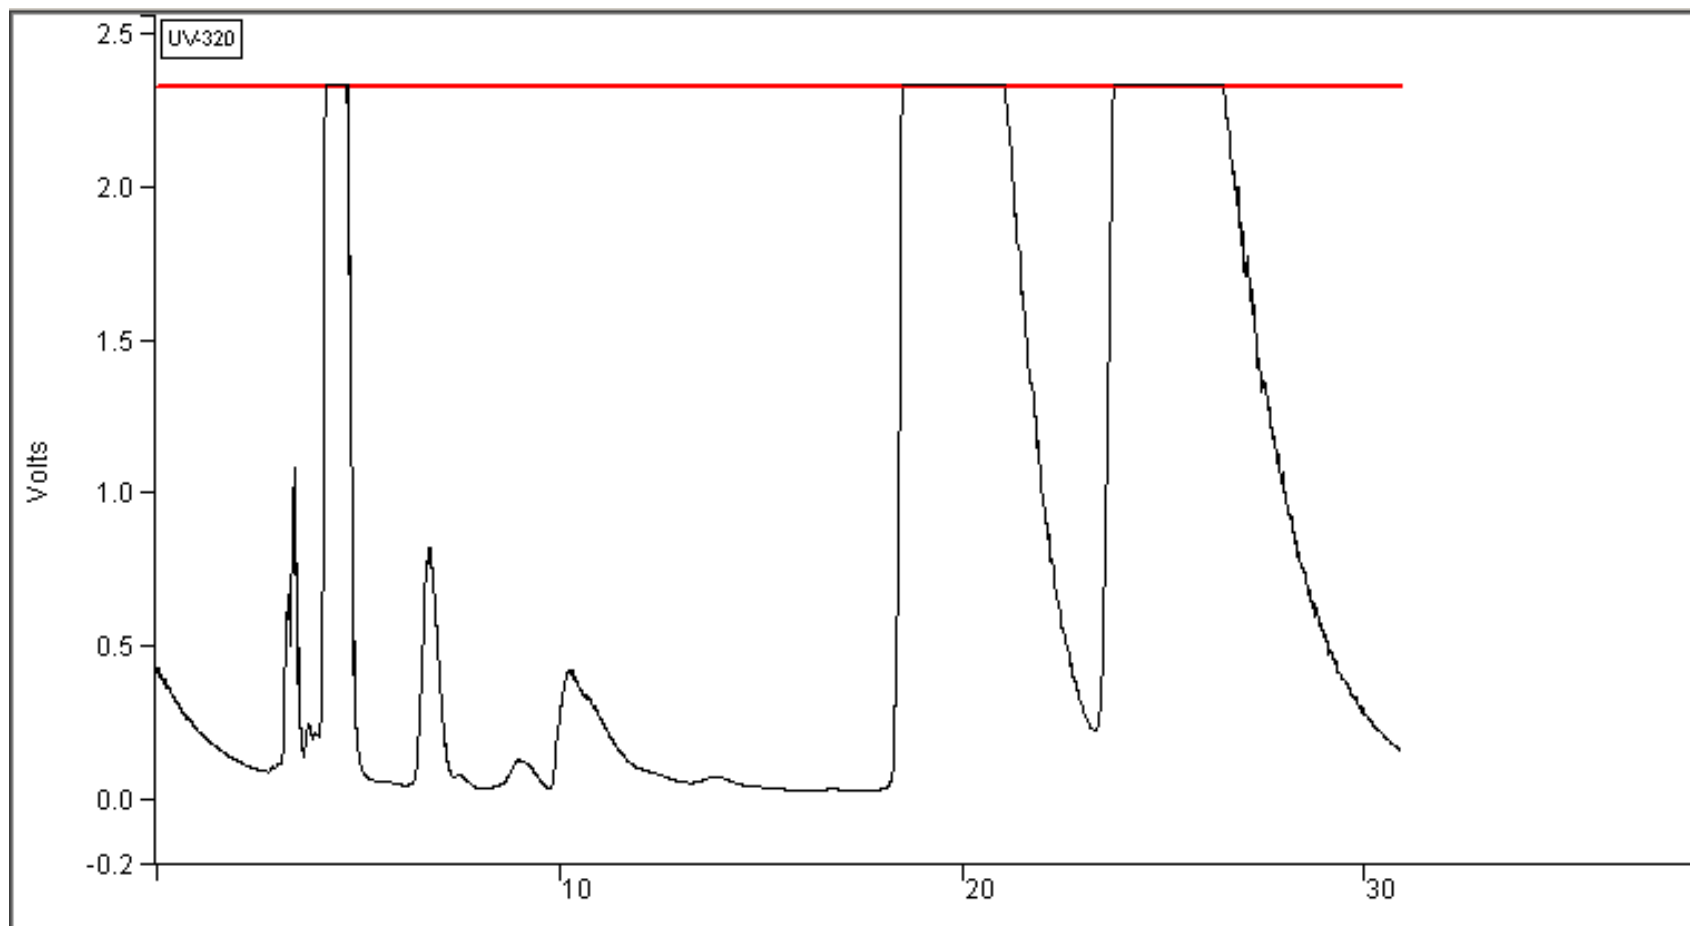

Figure 10S. A chromatogram recorded during search for the conditions suitable for separation of P-diastereomers. A silica gel column Phenomenex Luna 5u Silica column (100 Å; 250×10 mm) was loaded with ca. 70 mg of **6** and then eluted with ethyl acetate-hexane (7:3, v/v) at 5 ml min<sup>-1</sup>. A detector set at 275 nm.

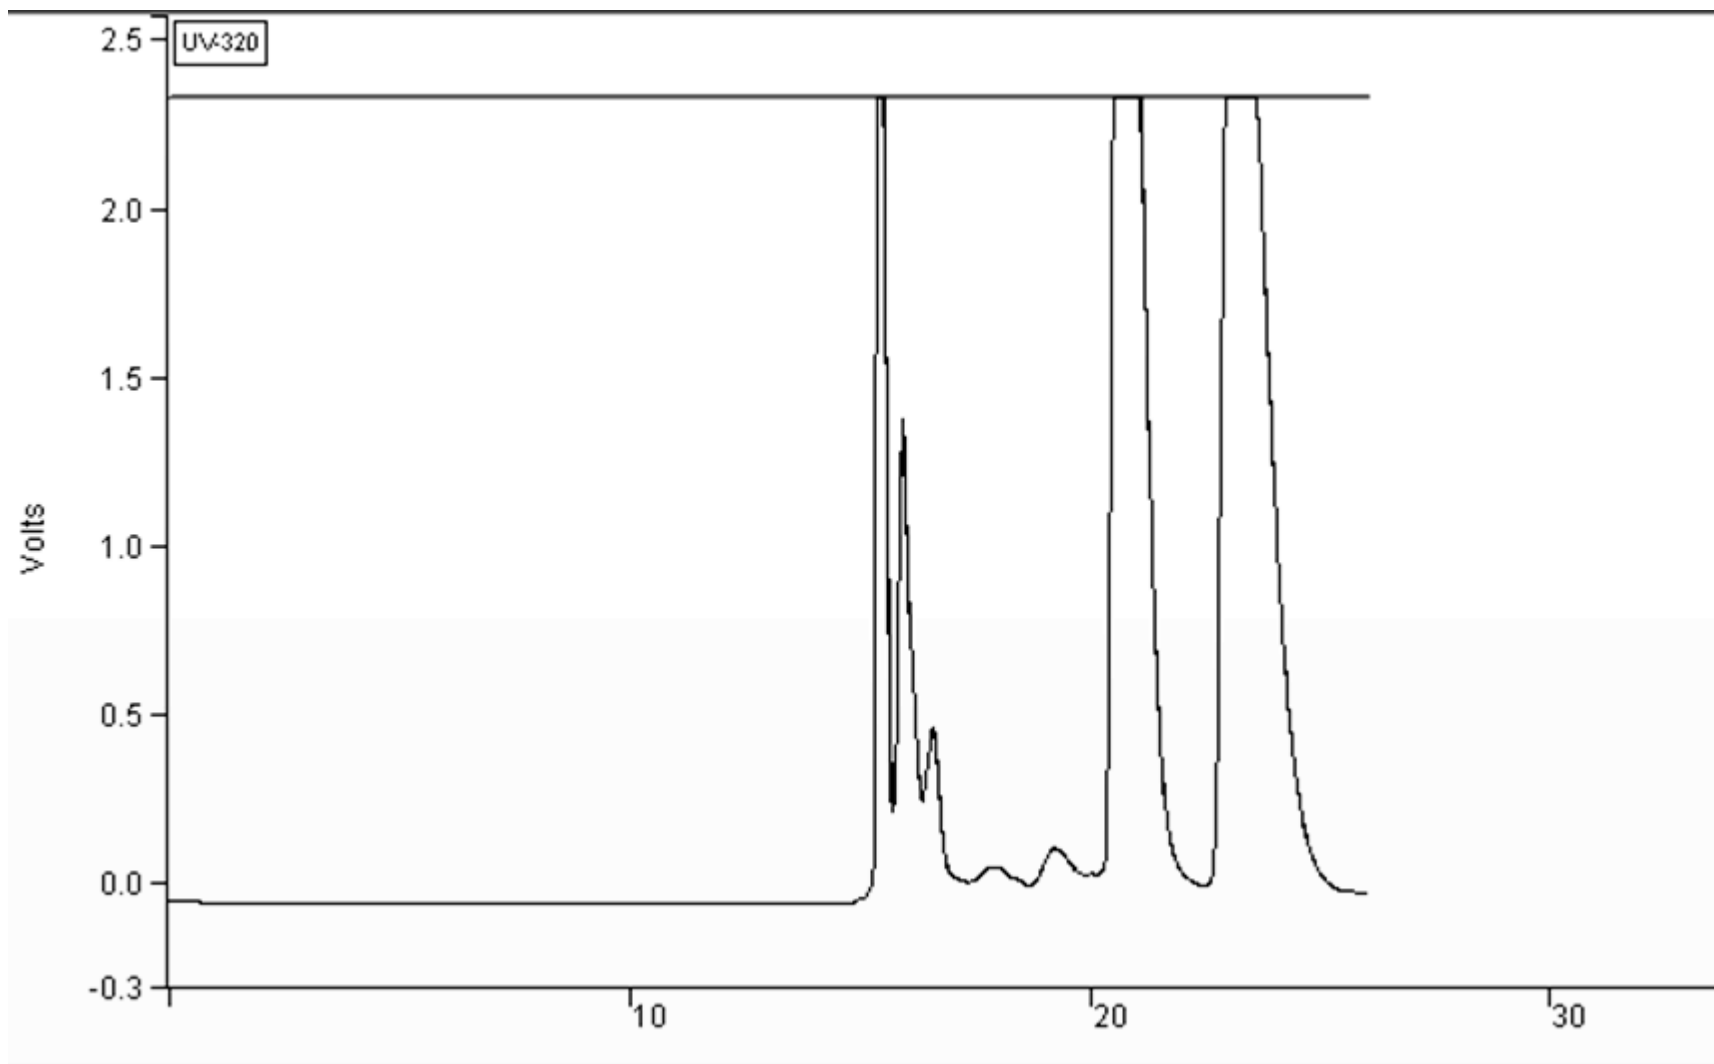

Figure 11S. A chromatogram recorded during search for the conditions suitable for separation of P-diastereomers of **7**. A silica gel column Phenomenex Luna 5u Silica column (100 Å; 250 × 10 mm) was loaded with ca. 30 mg of **7** and then eluted with ethyl acetate-hexane (1:1, v/v) at 5 ml min<sup>-1</sup>. A detector set at 275 nm.
